# Supplementary material for: Variation in extracellular matrix genes is associated with weight regain after weight loss in a sex-specific manner
Source: PubMed Central journal article supplement (PMC4653119; doi:10.1007/s12263-015-0506-y), 2015-11-19
Supplement: 12263_2015_506_MOESM1_ESM.pdf [file 12263_2015_506_MOESM1_ESM.pdf]

Supplement table 1: list of 124 candidate genes related to extracellular matrix

| gene    | count_dbSNPs | count_genotyped | chr | start       | end      |
|---------|--------------|-----------------|-----|-------------|----------|
| ACAN    | 1750         |                 | 33  | 15 89346674 | 89418585 |
| ADAM11  | 572          |                 | 6   | 17 42836399 | 42859214 |
| ADAM12  | 6981         | 167             |     | 10 1,28E+08 | 1,28E+08 |
| ADAM15  | 532          | 9               |     | 1 1,55E+08  | 1,55E+08 |
| ADAM17  | 1278         | 11              |     | 2 9628615   | 9695921  |
| ADAM19  | 3290         | 43              |     | 5 1,57E+08  | 1,57E+08 |
| ADAM22  | 3882         | 43              |     | 7 87563458  | 87832204 |
| ADAMTS1 | 509          | 15              |     | 21 28208606 | 28217728 |
| ADAMTS4 | 489          | 4               |     | 1 1,61E+08  | 1,61E+08 |
| ADAMTS5 | 1147         | 19              |     | 21 28290231 | 28338832 |
| AZGP1   | 489          | 3               |     | 7 99564343  | 99573780 |
| BGN     | 463          | 8 X             |     | 1,53E+08    | 1,53E+08 |
| BMP1    | 1366         | 15              |     | 8 22022249  | 22069839 |
| CALR    | 498          | 4               |     | 19 13049392 | 13055303 |
| CCDC80  | 1058         | 17              |     | 3 1,12E+08  | 1,12E+08 |
| CHI3L1  | 565          | 13              |     | 1 2,03E+08  | 2,03E+08 |
| CILP    | 653          | 9               |     | 15 65488337 | 65503826 |
| CNTNAP1 | 554          | 2               |     | 17 40834631 | 40851832 |
| COL11A1 | 4295         | 53              |     | 1 1,03E+08  | 1,04E+08 |
| COL12A1 | 2055         | 22              |     | 6 75794042  | 75915767 |
| COL14A1 | 4927         | 69              |     | 8 1,21E+08  | 1,21E+08 |
| COL15A1 | 2501         | 39              |     | 9 1,02E+08  | 1,02E+08 |
| COL18A1 | 2951         | 37              |     | 21 46825052 | 46933634 |
| COL1A1  | 1111         | 6               |     | 17 48260650 | 48278993 |
| COL1A2  | 1257         | 25              |     | 7 94023873  | 94060544 |
| COL23A1 | 7017         | 135             |     | 5 1,78E+08  | 1,78E+08 |
| COL2A1  | 1089         | 25              |     | 12 48366748 | 48398269 |
| COL3A1  | 975          | 20              |     | 2 1,9E+08   | 1,9E+08  |
| COL4A1  | 3541         | 89              |     | 13 1,11E+08 | 1,11E+08 |
| COL4A2  | 4826         | 84              |     | 13 1,11E+08 | 1,11E+08 |
| COL4A3  | 2897         | 67              |     | 2 2,28E+08  | 2,28E+08 |
| COL4A5  | 2927         | 6 X             |     | 1,08E+08    | 1,08E+08 |
| COL5A1  | 4749         | 79              |     | 9 1,38E+08  | 1,38E+08 |
| COL5A2  | 2410         | 10              |     | 2 1,9E+08   | 1,9E+08  |
| COL5A3  | 1512         | 17              |     | 19 10070237 | 10121147 |
| COL6A1  | 1091         | 6               |     | 21 47401651 | 47424964 |
| COL6A2  | 1596         | 17              |     | 21 47518011 | 47552763 |
| COL6A3  | 2292         | 42              |     | 2 2,38E+08  | 2,38E+08 |
| CSPG4   | 895          | 5               |     | 15 75966663 | 76005189 |
| CTGF    | 321          | 7               |     | 6 1,32E+08  | 1,32E+08 |
| DAG1    | 1125         | 6               |     | 3 49506146  | 49573048 |
| DCN     | 837          | 10              |     | 12 91539025 | 91576900 |
| DPT     | 1056         | 23              |     | 1 1,69E+08  | 1,69E+08 |
| ECM1    | 439          | 2               |     | 1 1,5E+08   | 1,5E+08  |
| ECM2    | 828          | 6               |     | 9 95256365  | 95298937 |
| EFEMP1  | 1133         | 15              |     | 2 56093102  | 56151274 |
| EFEMP2  | 543          | 2               |     | 11 65633912 | 65641063 |

|          |      |     |    |          |          |
|----------|------|-----|----|----------|----------|
| ELN      | 885  | 10  | 7  | 73442119 | 73484237 |
| EMILIN1  | 452  | 2   | 2  | 27301435 | 27309271 |
| EMILIN2  | 1738 | 26  | 18 | 2847028  | 2915991  |
| FBLN1    | 2283 | 50  | 22 | 45898118 | 45997015 |
| FBLN2    | 2283 | 42  | 3  | 13573824 | 13679922 |
| FBLN5    | 1620 | 42  | 14 | 92335756 | 92414331 |
| FBN1     | 3921 | 33  | 15 | 48700503 | 48938046 |
| FKBP9    | 1160 | 3   | 7  | 32997017 | 33046543 |
| FMOD     | 606  | 8   | 1  | 2,03E+08 | 2,03E+08 |
| FN1      | 1616 | 16  | 2  | 2,16E+08 | 2,16E+08 |
| GPC1     | 960  | 14  | 2  | 2,41E+08 | 2,41E+08 |
| ITGAM    | 1271 | 10  | 16 | 31271311 | 31344213 |
| ITGAV    | 1975 | 14  | 2  | 1,87E+08 | 1,88E+08 |
| ITGB1    | 1998 | 23  | 10 | 33189247 | 33294720 |
| ITGB2    | 1409 | 29  | 21 | 46305868 | 46351904 |
| ITGB5    | 2300 | 42  | 3  | 1,24E+08 | 1,25E+08 |
| LAMA2    | 9937 | 125 | 6  | 1,29E+08 | 1,3E+08  |
| LAMA4    | 2667 | 53  | 6  | 1,12E+08 | 1,13E+08 |
| LAMB1    | 1809 | 25  | 7  | 1,08E+08 | 1,08E+08 |
| LAMB2    | 532  | 3   | 3  | 49158547 | 49170551 |
| LAMC1    | 2218 | 18  | 1  | 1,83E+08 | 1,83E+08 |
| LGALS1   | 403  | 5   | 22 | 38071615 | 38075813 |
| LGALS3BP | 561  | 9   | 17 | 76967320 | 76976191 |
| LOX      | 540  | 6   | 5  | 1,21E+08 | 1,21E+08 |
| LOXL1    | 723  | 16  | 15 | 74218330 | 74244478 |
| LUM      | 500  | 5   | 12 | 91496406 | 91505608 |
| MATN2    | 2763 | 71  | 8  | 98881068 | 99048944 |
| MATN3    | 548  | 6   | 2  | 20191872 | 20212455 |
| MATN4    | 725  | 9   | 20 | 43922085 | 43937169 |
| MFAP4    | 359  | 2   | 17 | 19286755 | 19290553 |
| MMP1     | 549  | 11  | 11 | 1,03E+08 | 1,03E+08 |
| MMP10    | 579  | 15  | 11 | 1,03E+08 | 1,03E+08 |
| MMP14    | 614  | 10  | 14 | 23305766 | 23318236 |
| MMP19    | 464  | 1   | 12 | 56229217 | 56236750 |
| MMP2     | 2624 | 55  | 16 | 55423612 | 55540603 |
| MMP9     | 685  | 6   | 20 | 44637547 | 44645200 |
| NID1     | 1900 | 28  | 1  | 2,36E+08 | 2,36E+08 |
| NID2     | 1766 | 43  | 14 | 52471521 | 52535712 |
| NPNT     | 1984 | 21  | 4  | 1,07E+08 | 1,07E+08 |
| OGN      | 517  | 2   | 9  | 95146249 | 95166978 |
| P4HA1    | 1713 | 5   | 10 | 74766975 | 74856732 |
| P4HB     | 824  | 1   | 17 | 79801035 | 79818570 |
| PCOLCE   | 424  | 2   | 7  | 1E+08    | 1E+08    |
| PDIA3    | 690  | 2   | 15 | 44038590 | 44065477 |
| PDIA4    | 877  | 6   | 7  | 1,49E+08 | 1,49E+08 |
| PDIA6    | 1696 | 23  | 2  | 10923517 | 10978103 |
| PLOD1    | 1131 | 8   | 1  | 11994262 | 12035595 |
| PLOD2    | 1653 | 13  | 3  | 1,46E+08 | 1,46E+08 |
| PLOD3    | 678  | 6   | 7  | 1,01E+08 | 1,01E+08 |
| POSTN    | 909  | 11  | 13 | 38136720 | 38172981 |

|           |      |     |    |          |          |
|-----------|------|-----|----|----------|----------|
| PPIA      | 720  | 1   | 7  | 44836279 | 44864163 |
| PPIB      | 414  | 2   | 15 | 64448011 | 64455404 |
| PRELP     | 689  | 0   | 1  | 2,03E+08 | 2,03E+08 |
| PRG4      | 682  | 8   | 1  | 1,86E+08 | 1,86E+08 |
| PRSS3P1   | 545  | 0   | 7  | 1,42E+08 | 1,42E+08 |
| SERPINA12 | 993  | 27  | 14 | 94953611 | 94984181 |
| SERPINE1  | 593  | 7   | 7  | 1,01E+08 | 1,01E+08 |
| SERPINH1  | 528  | 10  | 11 | 75273101 | 75283828 |
| SPARC     | 730  | 15  | 5  | 1,51E+08 | 1,51E+08 |
| SPARCL1   | 1206 | 22  | 4  | 88394487 | 88452213 |
| SPON1     | 4807 | 75  | 11 | 13983914 | 14289646 |
| SPON2     | 1012 | 10  | 4  | 1160720  | 1202750  |
| TGFBI     | 905  | 12  | 5  | 1,35E+08 | 1,35E+08 |
| TGFBR3    | 3798 | 80  | 1  | 92145902 | 92371892 |
| THBS1     | 654  | 9   | 15 | 39873280 | 39891667 |
| THBS2     | 1244 | 18  | 6  | 1,7E+08  | 1,7E+08  |
| THBS3     | 492  | 2   | 1  | 1,55E+08 | 1,55E+08 |
| TIMP1     | 269  | 3 X |    | 47441712 | 47446188 |
| TIMP2     | 1731 | 22  | 17 | 76849059 | 76921469 |
| TIMP3     | 1298 | 35  | 22 | 33197687 | 33259030 |
| TIMP4     | 389  | 4   | 3  | 12194551 | 12200851 |
| TLL1      | 4402 | 45  | 4  | 1,67E+08 | 1,67E+08 |
| TLL2      | 2629 | 49  | 10 | 98124363 | 98273675 |
| TNC       | 2085 | 47  | 9  | 1,18E+08 | 1,18E+08 |
| TNN       | 1826 | 20  | 1  | 1,75E+08 | 1,75E+08 |
| TNXB      | 1307 | 17  | 6  | 32008931 | 32083111 |
| VCAN      | 2136 | 43  | 5  | 82767284 | 82878122 |
