# Supplementary material for: Variation in extracellular matrix genes is associated with weight regain after weight loss in a sex-specific manner
Source: PubMed Central journal article supplement (PMC4653119; doi:10.1007/s12263-015-0506-y), 2015-11-19
Supplement: 12263_2015_506_MOESM2_ESM.pdf [file 12263_2015_506_MOESM2_ESM.pdf]

Supplement table 2: list of 2903 single nucleotide polymorphisms for which genotype data was retrieved.

| snp      | gene     | allele | snp_pos   |
|----------|----------|--------|-----------|
| rs684    | ITGB2    | CT     | 46306161  |
| rs1085   | COL11A1  | AC     | 103356168 |
| rs1164   | EMILIN2  | CT     | 2917152   |
| rs2429   | COL14A1  | GT     | 121384163 |
| rs3522   | LOXL1    | CT     | 74244344  |
| rs4415   | FBLN1    | AG     | 45971880  |
| rs4416   | FBLN1    | AG     | 45972017  |
| rs4572   | TGFBI    | GT     | 135399452 |
| rs4625   | DAG1     | AG     | 49572140  |
| rs4715   | BMP1     | AC     | 22021037  |
| rs4799   | PDIA6    | CT     | 10933249  |
| rs4807   | PDIA6    | CT     | 10930903  |
| rs7242   | SERPINE1 | GT     | 100781445 |
| rs7381   | FBLN1    | CT     | 45996782  |
| rs8089   | THBS2    | AC     | 169617726 |
| rs8111   | TNXB     | CT     | 32083175  |
| rs8992   | ADAMTS1  | AG     | 28208954  |
| rs9254   | COL6A1   | AG     | 47424346  |
| rs9862   | TIMP3    | CT     | 33253280  |
| rs11369  | SPON1    | AG     | 14288096  |
| rs12140  | ADAMTS1  | CT     | 28209395  |
| rs13294  | ECM1     | AG     | 150484987 |
| rs13615  | ADAMTS1  | AG     | 28209667  |
| rs13652  | FN1      | CT     | 216249587 |
| rs13817  | EFEMP2   | AG     | 65628334  |
| rs17576  | MMP9     | AG     | 44640225  |
| rs20563  | LAMC1    | AG     | 183085755 |
| rs25659  | LAMB1    | AG     | 107626770 |
| rs28296  | VCAN     | CT     | 82760017  |
| rs33598  | VCAN     | CT     | 82775634  |
| rs33599  | VCAN     | AG     | 82774904  |
| rs33604  | VCAN     | AG     | 82770586  |
| rs42518  | COL1A2   | CT     | 94038934  |
| rs42523  | COL1A2   | CT     | 94040999  |
| rs42530  | COL1A2   | AG     | 94052495  |
| rs72509  | COL4A1   | GT     | 110903187 |
| rs80272  | TIMP3    | CT     | 33224779  |
| rs80610  | FBLN1    | AG     | 45971291  |
| rs130274 | TIMP3    | CT     | 33204334  |
| rs130293 | TIMP3    | AG     | 33221939  |
| rs130301 | TIMP3    | GT     | 33234199  |
| rs130559 | TIMP3    | CT     | 33188536  |
| rs130561 | TIMP3    | AC     | 33191373  |
| rs134821 | FBLN1    | CT     | 45970029  |

|          |         |    |           |
|----------|---------|----|-----------|
| rs135026 | TIMP3   | CT | 33212769  |
| rs135028 | TIMP3   | CT | 33228070  |
| rs135029 | TIMP3   | AG | 33240290  |
| rs135153 | TIMP3   | CT | 33191491  |
| rs136723 | FBLN1   | AG | 45916679  |
| rs136739 | FBLN1   | AG | 45928147  |
| rs136740 | FBLN1   | AG | 45928324  |
| rs136753 | FBLN1   | CT | 45936121  |
| rs136756 | FBLN1   | AG | 45937061  |
| rs137484 | TIMP3   | CT | 33251279  |
| rs137487 | TIMP3   | AG | 33259104  |
| rs137489 | TIMP3   | CT | 33262935  |
| rs151058 | ADAMTS5 | CT | 28311572  |
| rs151779 | MMP2    | CT | 55447824  |
| rs160277 | VCAN    | GT | 82837631  |
| rs160283 | VCAN    | AG | 82859485  |
| rs160380 | VCAN    | AG | 82810714  |
| rs162496 | ADAMTS5 | AG | 28306575  |
| rs162512 | ADAMTS5 | CT | 28284577  |
| rs162524 | ADAMTS5 | CT | 28282383  |
| rs169496 | TNXB    | CT | 32052983  |
| rs170962 | ITGB2   | CT | 46295995  |
| rs173686 | VCAN    | AG | 82811500  |
| rs183112 | MMP2    | AG | 55527682  |
| rs185493 | COL23A1 | CT | 177991258 |
| rs185819 | TNXB    | CT | 32050067  |
| rs188703 | VCAN    | AG | 82834299  |
| rs190145 | ADAMTS1 | CT | 28203478  |
| rs204899 | TNXB    | CT | 32057627  |
| rs226794 | ADAMTS5 | AG | 28302355  |
| rs229032 | ADAMTS1 | AG | 28200449  |
| rs229053 | ADAMTS5 | AC | 28316268  |
| rs229054 | ADAMTS5 | AG | 28316816  |
| rs229078 | ADAMTS5 | GT | 28296135  |
| rs229079 | ADAMTS5 | AG | 28298049  |
| rs229100 | ADAMTS1 | CT | 28223092  |
| rs233598 | ADAMTS5 | GT | 28330838  |
| rs233896 | ADAMTS5 | GT | 28324568  |
| rs235305 | ITGB2   | AG | 46298869  |
| rs235325 | ITGB2   | AG | 46311264  |
| rs235326 | ITGB2   | AG | 46311813  |
| rs235329 | ITGB2   | GT | 46314440  |
| rs240366 | COL12A1 | CT | 75915356  |
| rs240369 | COL12A1 | AG | 75919484  |
| rs240721 | COL12A1 | AG | 75879135  |
| rs240724 | COL12A1 | AG | 75852488  |
| rs240734 | COL12A1 | AG | 75847036  |
| rs240736 | COL12A1 | AG | 75848181  |

|          |         |    |           |
|----------|---------|----|-----------|
| rs241905 | TIMP3   | CT | 33266865  |
| rs242076 | TIMP3   | AG | 33229830  |
| rs242078 | TIMP3   | AG | 33228692  |
| rs242089 | TIMP3   | AG | 33213319  |
| rs243834 | MMP2    | AG | 55536687  |
| rs243840 | MMP2    | AG | 55528159  |
| rs243842 | MMP2    | CT | 55527422  |
| rs243866 | MMP2    | AG | 55511537  |
| rs251124 | VCAN    | CT | 82805424  |
| rs256459 | VCAN    | CT | 82775906  |
| rs262020 | COL23A1 | CT | 177964317 |
| rs262023 | COL23A1 | AG | 178025087 |
| rs262037 | COL23A1 | CT | 177990886 |
| rs262065 | COL23A1 | AC | 177999447 |
| rs265332 | LAMA2   | AG | 129551233 |
| rs265365 | LAMA2   | AG | 129556965 |
| rs265371 | LAMA2   | CT | 129600523 |
| rs265387 | LAMA2   | AG | 129564944 |
| rs265395 | LAMA2   | AG | 129594759 |
| rs265402 | LAMA2   | GT | 129578216 |
| rs284142 | TGFBR3  | CT | 92256626  |
| rs284169 | TGFBR3  | AG | 92213442  |
| rs284170 | TGFBR3  | CT | 92214628  |
| rs284175 | TGFBR3  | AG | 92222275  |
| rs284176 | TGFBR3  | AG | 92223976  |
| rs284180 | TGFBR3  | AC | 92227848  |
| rs284198 | TGFBR3  | GT | 92238167  |
| rs284202 | TGFBR3  | AG | 92241033  |
| rs284877 | TGFBR3  | CT | 92173796  |
| rs308362 | VCAN    | AG | 82823791  |
| rs308363 | VCAN    | AG | 82838532  |
| rs309556 | VCAN    | CT | 82840259  |
| rs309561 | VCAN    | AG | 82830308  |
| rs309581 | VCAN    | CT | 82871546  |
| rs309596 | VCAN    | CT | 82844728  |
| rs309599 | VCAN    | AG | 82881455  |
| rs310504 | VCAN    | CT | 82820278  |
| rs310517 | VCAN    | GT | 82814521  |
| rs331380 | ECM2    | CT | 95256519  |
| rs369982 | COL1A2  | AG | 94048482  |
| rs377258 | LAMA2   | GT | 129533324 |
| rs387298 | COL4A2  | AG | 111159628 |
| rs390955 | ADAMTS1 | AC | 28218457  |
| rs392840 | ADAMTS1 | CT | 28218381  |
| rs400218 | COL1A2  | AG | 94056006  |
| rs400532 | COL4A2  | AC | 111154631 |
| rs406174 | COL4A2  | AG | 111155363 |
| rs411717 | COL1A2  | CT | 94033031  |

|          |         |    |           |
|----------|---------|----|-----------|
| rs413756 | COL4A2  | CT | 111143755 |
| rs421587 | COL1A2  | AG | 94043274  |
| rs428815 | TGFBR3  | CT | 92260920  |
| rs441051 | COL1A2  | CT | 94054000  |
| rs445348 | COL4A2  | AG | 111158874 |
| rs467691 | ADAMTS5 | GT | 28286590  |
| rs468276 | ADAMTS1 | CT | 28203651  |
| rs470168 | MMP10   | AG | 102641382 |
| rs470215 | MMP1    | CT | 102661099 |
| rs470215 | MMP10   | CT | 102661099 |
| rs470504 | MMP1    | CT | 102658689 |
| rs470504 | MMP10   | CT | 102658689 |
| rs470747 | MMP1    | AG | 102661595 |
| rs471972 | DPT     | GT | 168701085 |
| rs472238 | COL23A1 | CT | 177968768 |
| rs489777 | COL23A1 | CT | 177960872 |
| rs492560 | COL4A1  | CT | 110919976 |
| rs497888 | COL4A1  | CT | 110916553 |
| rs498186 | MMP1    | AC | 102669645 |
| rs501630 | EFEMP2  | AG | 65637273  |
| rs504596 | COL23A1 | AG | 177974127 |
| rs506739 | EMILIN2 | AC | 2856536   |
| rs515242 | COL23A1 | AG | 177963524 |
| rs519806 | MMP1    | AG | 102675489 |
| rs529041 | COL4A1  | CT | 110860219 |
| rs529949 | DPT     | CT | 168691984 |
| rs529998 | VCAN    | CT | 82841764  |
| rs535858 | COL23A1 | AC | 177971352 |
| rs536014 | DPT     | CT | 168695477 |
| rs538060 | DPT     | AC | 168662302 |
| rs539707 | COL23A1 | CT | 177906494 |
| rs540519 | COL4A1  | AG | 110922195 |
| rs545833 | DPT     | CT | 168689940 |
| rs547561 | MMP10   | CT | 102643894 |
| rs552125 | COL4A1  | CT | 110938813 |
| rs553780 | COL23A1 | CT | 177961860 |
| rs554152 | COL12A1 | CT | 75789526  |
| rs555417 | COL23A1 | AG | 178010145 |
| rs556674 | COL12A1 | AG | 75811880  |
| rs561168 | COL4A1  | CT | 110884208 |
| rs561437 | COL4A1  | CT | 110936227 |
| rs562992 | COL4A1  | GT | 110908777 |
| rs564195 | COL23A1 | CT | 177965633 |
| rs564487 | COL23A1 | GT | 177977679 |
| rs566806 | DCN     | AG | 91559197  |
| rs566974 | COL23A1 | AG | 177985652 |
| rs574430 | COL4A1  | AG | 110852220 |
| rs574482 | DCN     | AG | 91538458  |

|          |          |    |           |
|----------|----------|----|-----------|
| rs581753 | DPT      | AG | 168679692 |
| rs585219 | COL23A1  | CT | 177936898 |
| rs585433 | SERPINH1 | AG | 75292601  |
| rs587409 | COL4A1   | CT | 110903507 |
| rs595325 | COL4A1   | AC | 110919205 |
| rs596279 | COL23A1  | CT | 177966921 |
| rs599483 | COL4A1   | AG | 110930364 |
| rs606452 | SERPINH1 | AC | 75276178  |
| rs608585 | SERPINH1 | AG | 75268704  |
| rs609309 | SERPINH1 | AG | 75287341  |
| rs613116 | COL4A1   | AC | 110808823 |
| rs614664 | ITGB5    | AC | 124486993 |
| rs616008 | COL4A1   | CT | 110878344 |
| rs619152 | COL4A1   | AG | 110939497 |
| rs621209 | ITGB5    | AG | 124494030 |
| rs622432 | COL23A1  | CT | 177910253 |
| rs622486 | COL4A1   | AG | 110848291 |
| rs623561 | EMILIN2  | AG | 2872586   |
| rs625053 | COL4A1   | AC | 110875942 |
| rs625820 | COL23A1  | GT | 177995909 |
| rs626444 | COL4A1   | CT | 110864396 |
| rs627527 | COL4A1   | AG | 110915135 |
| rs629241 | COL23A1  | CT | 177933945 |
| rs630943 | COL4A1   | AG | 110877046 |
| rs631428 | COL4A1   | CT | 110808681 |
| rs631451 | DPT      | AG | 168668005 |
| rs635567 | COL12A1  | AC | 75829646  |
| rs637647 | EMILIN2  | CT | 2881839   |
| rs640649 | SERPINH1 | AG | 75271851  |
| rs642624 | COL23A1  | CT | 177969010 |
| rs642887 | EMILIN2  | AG | 2874408   |
| rs642926 | EMILIN2  | AG | 2916054   |
| rs644582 | COL4A1   | AG | 110840028 |
| rs648705 | COL4A1   | AC | 110856153 |
| rs652054 | SERPINH1 | AC | 75275532  |
| rs656533 | COL4A1   | AG | 110793123 |
| rs657635 | FBN1     | AC | 48882966  |
| rs668842 | FBN1     | CT | 48891965  |
| rs672949 | COL4A1   | CT | 110879554 |
| rs673482 | SERPINH1 | AC | 75268603  |
| rs674503 | SERPINH1 | CT | 75268337  |
| rs679153 | EMILIN2  | GT | 2869916   |
| rs679958 | COL4A1   | CT | 110879007 |
| rs680484 | COL4A1   | GT | 110881085 |
| rs682367 | DPT      | AG | 168664450 |
| rs684320 | EMILIN2  | AG | 2851819   |
| rs688074 | COL23A1  | AG | 177965696 |
| rs695103 | VCAN     | CT | 82841476  |

|          |           |    |           |
|----------|-----------|----|-----------|
| rs713835 | LGALS1    | CT | 38064650  |
| rs713896 | FBLN1     | AG | 45908895  |
| rs715572 | TIMP3     | AG | 33234931  |
| rs716817 | PDIA4     | AG | 148694939 |
| rs716818 | PDIA4     | CT | 148694971 |
| rs717975 | SERPINA12 | CT | 94944874  |
| rs718041 | TGFBI     | CT | 135370197 |
| rs723556 | TIMP1     | AG | 47432747  |
| rs724617 | FN1       | AG | 216282481 |
| rs726063 | FBLN5     | CT | 92373198  |
| rs726328 | ADAM22    | CT | 87739123  |
| rs730179 | TLL2      | AG | 98171325  |
| rs732989 | SPON1     | AG | 13978737  |
| rs734566 | TLL2      | CT | 98255314  |
| rs734909 | ADAM22    | AC | 87836113  |
| rs736389 | MATN4     | CT | 43946768  |
| rs736846 | DPT       | AG | 168695609 |
| rs737088 | TIMP3     | CT | 33187942  |
| rs739215 | FBLN1     | AG | 45967526  |
| rs739270 | FBLN1     | AG | 45943203  |
| rs741198 | FBLN5     | CT | 92367411  |
| rs741212 | DCN       | AG | 91574742  |
| rs743257 | MMP14     | CT | 23315331  |
| rs743642 | BGN       | GT | 152774221 |
| rs743931 | FBLN1     | AG | 45959540  |
| rs746997 | NID1      | AG | 236195181 |
| rs748004 | TLL2      | GT | 98158431  |
| rs748289 | ADAM12    | CT | 127837841 |
| rs749167 | NID1      | CT | 236177874 |
| rs749259 | COL5A3    | CT | 10113626  |
| rs749425 | COL23A1   | CT | 177751751 |
| rs750449 | FBLN1     | CT | 45894122  |
| rs751181 | COL23A1   | GT | 177776148 |
| rs752283 | COL23A1   | CT | 177682664 |
| rs753833 | FBLN2     | CT | 13606196  |
| rs754423 | NID2      | CT | 52527187  |
| rs755251 | FBN1      | AG | 48812020  |
| rs756462 | TGFBI     | CT | 135367945 |
| rs756625 | CILP      | AG | 65493309  |
| rs757931 | LAMB1     | AC | 107586518 |
| rs760458 | ITGB2     | AC | 46328917  |
| rs760462 | ITGB2     | CT | 46328099  |
| rs762052 | MMP14     | AG | 23308986  |
| rs762438 | COL6A2    | CT | 47536546  |
| rs762625 | CHI3L1    | CT | 203145301 |
| rs762990 | LGALS1    | AG | 38085475  |
| rs763100 | FBLN1     | AC | 45988571  |
| rs763101 | FBLN1     | GT | 45988612  |

|          |         |    |           |
|----------|---------|----|-----------|
| rs810687 | COL1A2  | AG | 94034848  |
| rs837531 | MMP2    | CT | 55494432  |
| rs848792 | ITGB5   | CT | 124574342 |
| rs857587 | PRG4    | AG | 186261061 |
| rs857591 | PRG4    | GT | 186257518 |
| rs868589 | ADAM12  | CT | 128002008 |
| rs869776 | COL15A1 | CT | 101810339 |
| rs872328 | ADAM12  | CT | 127710102 |
| rs872587 | COL4A2  | AC | 111015780 |
| rs873957 | ADAM12  | AG | 128003149 |
| rs876043 | FBLN5   | AG | 92357145  |
| rs876084 | COL14A1 | CT | 121101522 |
| rs877336 | MMP2    | GT | 55442987  |
| rs879266 | TLL2    | AG | 98263545  |
| rs880295 | ADAM11  | CT | 42848094  |
| rs880633 | CHI3L1  | CT | 203152801 |
| rs881029 | GPC1    | CT | 241403014 |
| rs882727 | COL15A1 | AG | 101730121 |
| rs883873 | TGFBR3  | AG | 92380302  |
| rs889125 | COL5A3  | AC | 10120571  |
| rs889130 | COL5A3  | CT | 10063445  |
| rs890801 | COL23A1 | AG | 177715291 |
| rs890807 | COL23A1 | AG | 177718389 |
| rs890813 | COL23A1 | CT | 177751488 |
| rs893226 | MMP2    | GT | 55502896  |
| rs893260 | MMP2    | AG | 55444847  |
| rs893817 | LOXL1   | AG | 74229065  |
| rs893821 | LOXL1   | CT | 74241235  |
| rs894761 | EMILIN2 | AC | 2856482   |
| rs896056 | FBLN2   | AG | 13583528  |
| rs897189 | MATN2   | CT | 98963817  |
| rs897190 | MATN2   | AG | 98945345  |
| rs900030 | SPON2   | CT | 1193832   |
| rs901913 | TGFBR3  | GT | 92293162  |
| rs902370 | LAMA2   | AG | 129605056 |
| rs903352 | COL4A1  | AC | 110917524 |
| rs903354 | COL4A1  | GT | 110916819 |
| rs903355 | COL4A1  | AG | 110952028 |
| rs903355 | COL4A2  | AG | 110952028 |
| rs908810 | FBLN2   | AG | 13674571  |
| rs912946 | COL4A2  | AG | 111147846 |
| rs913746 | COL4A2  | AC | 111016124 |
| rs914991 | COL15A1 | AC | 101834340 |
| rs917055 | COL2A1  | AG | 48385576  |
| rs917205 | ADAM22  | AG | 87717762  |
| rs918542 | COL5A3  | CT | 10071634  |
| rs920686 | CILP    | AG | 65511429  |
| rs922146 | TLL1    | AG | 166798354 |

|           |         |    |           |
|-----------|---------|----|-----------|
| rs924209  | COL6A3  | CT | 238227536 |
| rs927730  | NID1    | CT | 236209883 |
| rs928111  | COL4A2  | AC | 111016886 |
| rs929039  | LGALS1  | CT | 38071511  |
| rs929608  | FBLN5   | CT | 92336775  |
| rs930054  | COL23A1 | AC | 177755433 |
| rs933106  | LAMA2   | AG | 129845907 |
| rs937618  | VCAN    | CT | 82782892  |
| rs938605  | ACAN    | AG | 89424581  |
| rs938608  | ACAN    | GT | 89398605  |
| rs938613  | ACAN    | AG | 89377773  |
| rs938952  | CILP    | CT | 65489128  |
| rs939585  | ACAN    | CT | 89378258  |
| rs939590  | ACAN    | AG | 89425779  |
| rs944223  | TNC     | AG | 117823775 |
| rs944510  | TNC     | CT | 117853022 |
| rs944949  | OGN     | AG | 95140613  |
| rs945256  | TNC     | AG | 117886024 |
| rs946261  | CHI3L1  | CT | 203157873 |
| rs946262  | CHI3L1  | CT | 203158229 |
| rs946263  | CHI3L1  | AG | 203165381 |
| rs946615  | NID2    | CT | 52481917  |
| rs951958  | ADAM19  | AC | 156889097 |
| rs953288  | TNC     | AC | 117805719 |
| rs953386  | COL4A1  | CT | 110943692 |
| rs954326  | COL2A1  | GT | 48394823  |
| rs955293  | COL14A1 | AG | 121080548 |
| rs959537  | COL14A1 | GT | 121253053 |
| rs962066  | VCAN    | GT | 82768214  |
| rs964114  | NID1    | AG | 236230900 |
| rs964141  | MATN2   | AG | 98962450  |
| rs969139  | LAMA4   | CT | 112446876 |
| rs970547  | COL12A1 | CT | 75797302  |
| rs971394  | NID2    | AG | 52522539  |
| rs971402  | LAMA4   | AG | 112487900 |
| rs976240  | COL15A1 | AG | 101797043 |
| rs977795  | MATN2   | AG | 98996027  |
| rs981181  | CCDC80  | AC | 112353238 |
| rs985461  | ADAM12  | CT | 127769545 |
| rs985462  | ADAM12  | CT | 127769598 |
| rs990541  | LAMA2   | AG | 129556517 |
| rs994370  | NPNT    | CT | 106923626 |
| rs1000989 | COL4A1  | CT | 110827303 |
| rs1003349 | MMP14   | GT | 23305663  |
| rs1005913 | MMP2    | GT | 55504521  |
| rs1006666 | ADAM12  | CT | 127854772 |
| rs1007856 | ITGB5   | AG | 124604858 |
| rs1009002 | ITGB1   | AG | 33236901  |



|           |           |    |           |
|-----------|-----------|----|-----------|
| rs1010222 | CALR      | AG | 13048608  |
| rs1010831 | COL14A1   | AC | 121257344 |
| rs1012466 | TNN       | CT | 175109884 |
| rs1012808 | SERPINA12 | AG | 94961086  |
| rs1015081 | ACAN      | AG | 89382608  |
| rs1017723 | ADAM12    | CT | 127746825 |
| rs1017813 | ITGB5     | CT | 124591985 |
| rs1017957 | TGFBR3    | CT | 92314131  |
| rs1018139 | TLL1      | AG | 166848001 |
| rs1018643 | COL4A2    | AG | 111096925 |
| rs1018829 | TNN       | AG | 175109722 |
| rs1020235 | ITGAV     | CT | 187447029 |
| rs1025412 | SPON1     | AG | 14246296  |
| rs1025413 | SPON1     | CT | 14247109  |
| rs1028157 | FBLN2     | GT | 13617049  |
| rs1032255 | TGFBR3    | CT | 92286940  |
| rs1033813 | COL15A1   | CT | 101698023 |
| rs1034620 | COL1A2    | CT | 94063415  |
| rs1034762 | COL2A1    | AC | 48389643  |
| rs1036477 | FBN1      | AG | 48914926  |
| rs1039494 | TLL1      | AG | 166941483 |
| rs1041631 | COL15A1   | AG | 101781858 |
| rs1042630 | ACAN      | AG | 89402051  |
| rs1042704 | MMP14     | AG | 23312594  |
| rs1042917 | COL6A2    | AG | 47545768  |
| rs1050348 | LAMA4     | AG | 112493872 |
| rs1050813 | SERPINE1  | AG | 100781615 |
| rs1051069 | NID2      | AG | 52478315  |
| rs1051442 | THBS1     | CT | 39887649  |
| rs1051534 | COL14A1   | AG | 121062077 |
| rs1053312 | COL6A1    | AG | 47423389  |
| rs1053605 | MMP2      | CT | 55519607  |
| rs1056204 | ADAM17    | AC | 9647091   |
| rs1057285 | TNN       | CT | 175126845 |
| rs1058177 | LAMC1     | AG | 183109171 |
| rs1060545 | TNC       | AC | 117821618 |
| rs1061375 | FBLN2     | AG | 13679203  |
| rs1061947 | COL1A1    | AG | 48262119  |
| rs1063964 | ADAM22    | AG | 87835469  |
| rs1091811 | ELN       | AG | 73491212  |
| rs1091813 | ELN       | CT | 73489736  |
| rs1091814 | ELN       | AC | 73489663  |
| rs1107373 | TNC       | AG | 117779933 |
| rs1110163 | COL23A1   | AG | 177761768 |
| rs1120519 | COL11A1   | CT | 103402184 |
| rs1122869 | COL3A1    | AG | 189829688 |
| rs1123875 | SPON1     | CT | 14253824  |
| rs1126499 | BGN       | CT | 152771509 |

|           |         |    |           |
|-----------|---------|----|-----------|
| rs1126823 | ACAN    | AG | 89417238  |
| rs1127648 | CSPG4   | AG | 75967095  |
| rs1130643 | SPARCL1 | CT | 88412806  |
| rs1131296 | COL6A3  | AG | 238243292 |
| rs1133219 | COL4A1  | AG | 110813709 |
| rs1134745 | COL4A3  | CT | 228177567 |
| rs1143678 | ITGAM   | CT | 31343005  |
| rs1143683 | ITGAM   | CT | 31336888  |
| rs1143914 | COL4A1  | AG | 110867235 |
| rs1150752 | TNXB    | CT | 32064726  |
| rs1150754 | TNXB    | CT | 32050758  |
| rs1151573 | NID2    | AG | 52468641  |
| rs1151578 | NID2    | GT | 52477782  |
| rs1151579 | NID2    | AG | 52477835  |
| rs1151582 | NID2    | CT | 52482768  |
| rs1152653 | ADAM12  | AG | 127759334 |
| rs1158471 | COL14A1 | CT | 121277396 |
| rs1158747 | LAMA4   | GT | 112500650 |
| rs1160798 | LAMA4   | CT | 112438446 |
| rs1170390 | PLOD2   | CT | 145863779 |
| rs1187056 | ITGB1   | AG | 33260547  |
| rs1187070 | ITGB1   | AC | 33241138  |
| rs1187078 | ITGB1   | AG | 33249133  |
| rs1187086 | ITGB1   | AG | 33281942  |
| rs1187095 | ITGB1   | CT | 33266888  |
| rs1192198 | COL4A1  | CT | 110811578 |
| rs1192201 | COL4A1  | AG | 110806490 |
| rs1192202 | COL4A1  | AC | 110806524 |
| rs1192524 | TGFBR3  | AG | 92340684  |
| rs1198873 | PDIA6   | CT | 10924524  |
| rs1208984 | PLOD1   | AG | 11995176  |
| rs1241163 | COL11A1 | AC | 103355765 |
| rs1241169 | COL11A1 | CT | 103384610 |
| rs1241182 | COL11A1 | AC | 103348100 |
| rs1250023 | TNC     | CT | 117869930 |
| rs1250105 | SPON2   | CT | 1203265   |
| rs1250126 | SPON2   | AG | 1191042   |
| rs1250248 | FN1     | AG | 216287093 |
| rs1250249 | FN1     | AG | 216287276 |
| rs1253682 | NID2    | CT | 52463153  |
| rs1265646 | ITGB5   | AG | 124592700 |
| rs1271449 | TNC     | CT | 117852522 |
| rs1273108 | TNC     | AG | 117866424 |
| rs1278278 | ADAM12  | AG | 127753274 |
| rs1278280 | ADAM12  | GT | 127755544 |
| rs1278282 | ADAM12  | AC | 127756457 |
| rs1278300 | ADAM12  | AG | 127791184 |
| rs1278302 | ADAM12  | AC | 127798951 |

|           |         |    |           |
|-----------|---------|----|-----------|
| rs1278313 | ADAM12  | CT | 127814489 |
| rs1278315 | ADAM12  | CT | 127815531 |
| rs1278325 | ADAM12  | CT | 127820978 |
| rs1278327 | ADAM12  | AC | 127822430 |
| rs1278329 | ADAM12  | GT | 127823151 |
| rs1278331 | ADAM12  | CT | 127823470 |
| rs1278352 | ADAM12  | AG | 127773376 |
| rs1278377 | ADAM12  | AG | 127869478 |
| rs1293989 | PRG4    | AC | 186267100 |
| rs1320131 | GPC1    | CT | 241411289 |
| rs1323070 | COL12A1 | AG | 75923605  |
| rs1330351 | TNC     | AG | 117840922 |
| rs1330361 | TNC     | AG | 117797394 |
| rs1330362 | TNC     | CT | 117779668 |
| rs1330365 | TNC     | AG | 117817683 |
| rs1330368 | TNC     | AG | 117821026 |
| rs1342548 | ITGB1   | AG | 33188102  |
| rs1344733 | EFEMP1  | CT | 56128027  |
| rs1345319 | MMP2    | AG | 55461759  |
| rs1346787 | EFEMP1  | CT | 56092612  |
| rs1347653 | MMP2    | GT | 55505040  |
| rs1353681 | TLL1    | AG | 167023255 |
| rs1354306 | TLL1    | CT | 166889511 |
| rs1356168 | COL5A2  | AG | 190018099 |
| rs1360686 | COL15A1 | AG | 101823327 |
| rs1367228 | EFEMP1  | AC | 56112440  |
| rs1380439 | ADAM12  | CT | 127768110 |
| rs1382192 | PDIA4   | AG | 148707278 |
| rs1384364 | TIMP2   | AG | 76852828  |
| rs1390964 | NID2    | CT | 52529923  |
| rs1391334 | TLL1    | AC | 167027707 |
| rs1393851 | TLL1    | AG | 166862885 |
| rs1393855 | TLL1    | AG | 166972657 |
| rs1411456 | TNC     | AG | 117803882 |
| rs1412335 | DPT     | CT | 168658880 |
| rs1413294 | COL15A1 | AG | 101725509 |
| rs1413299 | COL15A1 | GT | 101761241 |
| rs1415363 | COL11A1 | AG | 103552935 |
| rs1420227 | MMP2    | CT | 55465544  |
| rs1420228 | MMP2    | AG | 55485173  |
| rs1422794 | ADAM19  | GT | 156936549 |
| rs1422795 | ADAM19  | CT | 156936364 |
| rs1423569 | VCAN    | CT | 82803452  |
| rs1426715 | FBN1    | AG | 48741996  |
| rs1427378 | TIMP3   | AG | 33252041  |
| rs1430197 | EFEMP1  | AG | 56134827  |
| rs1437245 | MMP2    | AC | 55481549  |
| rs1437248 | MMP2    | AG | 55461198  |

|           |         |    |           |
|-----------|---------|----|-----------|
| rs1437799 | FN1     | CT | 216282993 |
| rs1448427 | ITGAV   | AG | 187526672 |
| rs1454713 | MATN2   | CT | 99025466  |
| rs1459709 | ADAM12  | AG | 127872828 |
| rs1459713 | ADAM12  | CT | 127735594 |
| rs1460060 | TLL1    | AC | 166815429 |
| rs1460062 | TLL1    | AG | 166804284 |
| rs1462359 | SPARCL1 | CT | 88442417  |
| rs1463034 | COL11A1 | CT | 103455217 |
| rs1463035 | COL11A1 | CT | 103450196 |
| rs1463039 | COL11A1 | CT | 103361698 |
| rs1468358 | PLOD3   | CT | 100853173 |
| rs1470425 | COL4A1  | AG | 110819991 |
| rs1470428 | COL4A1  | CT | 110819854 |
| rs1472057 | LAMA2   | CT | 129653602 |
| rs1474552 | ITGB2   | CT | 46337290  |
| rs1474868 | PLOD1   | CT | 12044164  |
| rs1475584 | ADAMTS1 | CT | 28220730  |
| rs1478604 | THBS1   | CT | 39873321  |
| rs1478804 | LAMA2   | AG | 129429694 |
| rs1478806 | LAMA2   | AG | 129533619 |
| rs1497077 | NID2    | CT | 52491655  |
| rs1497290 | ADAMTS5 | AG | 28348083  |
| rs1499966 | ITGB5   | AG | 124585214 |
| rs1503292 | TLL1    | AC | 166867875 |
| rs1503293 | TLL1    | CT | 167010685 |
| rs1503294 | TLL1    | AG | 166905263 |
| rs1516454 | COL3A1  | AG | 189844000 |
| rs1516797 | ACAN    | GT | 89410314  |
| rs1528640 | SPON1   | AG | 14070828  |
| rs1528648 | SPON1   | AG | 14139686  |
| rs1528654 | SPON1   | AG | 14127493  |
| rs1528657 | SPON1   | GT | 13990544  |
| rs1528658 | SPON1   | GT | 13990280  |
| rs1528667 | SPON1   | AG | 14033524  |
| rs1530169 | LOXL1   | CT | 74237120  |
| rs1536622 | COL4A2  | CT | 111064526 |
| rs1537504 | COL15A1 | AG | 101829542 |
| rs1537506 | COL15A1 | CT | 101821169 |
| rs1540923 | PLOD1   | AG | 12032030  |
| rs1543709 | COL15A1 | CT | 101752089 |
| rs1543803 | TIMP3   | GT | 33265922  |
| rs1544926 | COL23A1 | AG | 177665342 |
| rs1544928 | COL23A1 | AG | 177710630 |
| rs1545030 | SPARC   | CT | 151067412 |
| rs1545692 | ADAM12  | AG | 127866255 |
| rs1545751 | COL23A1 | AC | 177980792 |
| rs1548638 | LAMB1   | GT | 107604818 |

|           |         |    |           |
|-----------|---------|----|-----------|
| rs1551679 | ADAM12  | GT | 127854622 |
| rs1553469 | CNTNAP1 | AC | 40842762  |
| rs1555890 | TGFBR3  | CT | 92160886  |
| rs1556122 | COL4A2  | CT | 110985607 |
| rs1556124 | COL4A2  | AG | 110991189 |
| rs1556220 | TNC     | CT | 117812777 |
| rs1556329 | COL18A1 | CT | 46912386  |
| rs1556791 | DPT     | CT | 168700485 |
| rs1558085 | ADAM11  | AG | 42854208  |
| rs1558670 | MMP2    | CT | 55478046  |
| rs1559144 | ADAM19  | AG | 156881853 |
| rs1562808 | FBLN2   | CT | 13665148  |
| rs1563389 | COL14A1 | CT | 121301474 |
| rs1563400 | COL14A1 | CT | 121268269 |
| rs1566128 | NID2    | AG | 52514981  |
| rs1566153 | COL6A3  | CT | 238239441 |
| rs1570831 | NID1    | AC | 236153161 |
| rs1609340 | SPON1   | CT | 14124088  |
| rs1609341 | SPON1   | GT | 14124311  |
| rs1621212 | ADAM12  | CT | 127841282 |
| rs1623958 | PDIA6   | GT | 10980653  |
| rs1624391 | ADAM12  | CT | 127833685 |
| rs1626087 | PDIA6   | CT | 10963420  |
| rs1635544 | COL2A1  | AG | 48380031  |
| rs1637490 | ADAM22  | AG | 87628945  |
| rs1637500 | ADAM22  | GT | 87594188  |
| rs1644733 | COL5A3  | CT | 10129262  |
| rs1663501 | ADAMTS1 | AG | 28219307  |
| rs1674925 | ADAM12  | GT | 127850697 |
| rs1674927 | ADAM12  | CT | 127852395 |
| rs1674934 | ADAM12  | CT | 127857804 |
| rs1676486 | COL11A1 | AG | 103354138 |
| rs1676509 | COL11A1 | CT | 103375336 |
| rs1676719 | ADAM12  | CT | 127843169 |
| rs1676731 | ADAM12  | CT | 127848239 |
| rs1676734 | ADAM12  | CT | 127849558 |
| rs1676741 | ADAM12  | AG | 127851530 |
| rs1678979 | FBN1    | CT | 48896830  |
| rs1678983 | FBN1    | CT | 48930645  |
| rs1686444 | PDIA6   | CT | 10937409  |
| rs1686447 | PDIA6   | CT | 10935224  |
| rs1686468 | PDIA6   | AG | 10986626  |
| rs1686484 | PDIA6   | AG | 10970473  |
| rs1686486 | PDIA6   | AG | 10969564  |
| rs1688886 | ADAM22  | AG | 87603743  |
| rs1688888 | ADAM22  | CT | 87605618  |
| rs1688890 | ADAM22  | CT | 87606246  |
| rs1707469 | PLOD2   | AC | 145861305 |

|           |         |    |           |
|-----------|---------|----|-----------|
| rs1710278 | ADAM12  | AG | 127738918 |
| rs1710293 | ADAM12  | AC | 127744829 |
| rs1710309 | ADAM12  | CT | 127733386 |
| rs1710313 | ADAM12  | AC | 127734513 |
| rs1732164 | LAMB1   | AG | 107649288 |
| rs1734389 | PDIA6   | CT | 10985364  |
| rs1734394 | PDIA6   | CT | 10986305  |
| rs1734395 | PDIA6   | GT | 10986902  |
| rs1757095 | TNC     | CT | 117848394 |
| rs1757096 | TNC     | GT | 117849641 |
| rs1757106 | TNC     | GT | 117845333 |
| rs1790994 | EMILIN2 | CT | 2913431   |
| rs1793923 | COL2A1  | CT | 48384122  |
| rs1793949 | COL2A1  | AG | 48371595  |
| rs1793958 | COL2A1  | AG | 48392433  |
| rs1800222 | COL1A2  | CT | 94030899  |
| rs1804506 | TGFBR3  | CT | 92148013  |
| rs1805110 | TGFBR3  | AG | 92327045  |
| rs1805113 | TGFBR3  | AG | 92177938  |
| rs1805116 | TGFBR3  | CT | 92149096  |
| rs1816594 | MMP2    | CT | 55489908  |
| rs1819084 | SPON1   | AC | 13996155  |
| rs1826956 | TLL1    | CT | 167019072 |
| rs1830390 | SPON1   | AG | 13996226  |
| rs1846371 | COL23A1 | CT | 177888966 |
| rs1852755 | SPON1   | CT | 13996686  |
| rs1852757 | SPON1   | CT | 13987892  |
| rs1858822 | COL1A2  | AG | 94032753  |
| rs1861087 | FBLN5   | CT | 92371353  |
| rs1861320 | MMP2    | GT | 55541040  |
| rs1864658 | SPON1   | CT | 14256444  |
| rs1867667 | VCAN    | AG | 82779013  |
| rs1869609 | MATN2   | AG | 98991221  |
| rs1869610 | MATN2   | AC | 98945834  |
| rs1869612 | MATN2   | AG | 98925477  |
| rs1869831 | COL14A1 | AG | 121292407 |
| rs1870510 | ADAM12  | CT | 127837577 |
| rs1870881 | SPARCL1 | AG | 88435789  |
| rs1871054 | ADAM12  | CT | 127782409 |
| rs1873329 | LAMA2   | CT | 129662357 |
| rs1874573 | COL6A3  | AG | 238301184 |
| rs1876206 | FBN1    | CT | 48900586  |
| rs1878026 | ADAM12  | CT | 127710314 |
| rs1878027 | ADAM12  | CT | 127698643 |
| rs1878030 | ADAM12  | CT | 127786509 |
| rs1878172 | FBLN2   | AG | 13642870  |
| rs1878173 | FBLN2   | AG | 13642946  |
| rs1879529 | ACAN    | GT | 89414295  |

|           |           |    |           |
|-----------|-----------|----|-----------|
| rs1881512 | SPON1     | CT | 14103801  |
| rs1881516 | SPON1     | CT | 13993498  |
| rs1882435 | COL4A3    | AC | 228102752 |
| rs1885019 | NID1      | AG | 236203911 |
| rs1888221 | TNC       | AG | 117778355 |
| rs1889892 | LAMA2     | AG | 129762310 |
| rs1893152 | EMILIN2   | CT | 2841862   |
| rs1894681 | LAMA4     | AG | 112504110 |
| rs1913185 | PLOD2     | GT | 145888457 |
| rs1914037 | COL3A1    | AG | 189845515 |
| rs1919295 | SPON1     | CT | 14070567  |
| rs1919297 | SPON1     | GT | 14089499  |
| rs1919309 | SPON1     | CT | 14029854  |
| rs1922021 | COL4A3    | CT | 228025756 |
| rs1922022 | COL4A3    | CT | 228030362 |
| rs1923702 | TLL2      | GT | 98115684  |
| rs1926261 | TGFBR3    | CT | 92162920  |
| rs1927343 | COL4A2    | GT | 111053959 |
| rs1931002 | CTGF      | CT | 132278482 |
| rs1937090 | TLL2      | GT | 98224776  |
| rs1939008 | MMP1      | AG | 102656423 |
| rs1939008 | MMP10     | AG | 102656423 |
| rs1948307 | LAMA2     | CT | 129638583 |
| rs1950134 | COL4A3    | AG | 228062952 |
| rs1951007 | SERPINA12 | AG | 94969696  |
| rs1951017 | SERPINA12 | AG | 94979283  |
| rs1956280 | NID2      | CT | 52542247  |
| rs1968510 | FN1       | AG | 216258251 |
| rs1969539 | SPON1     | AG | 14038621  |
| rs1975919 | COL11A1   | AG | 103403752 |
| rs1977893 | COL4A1    | CT | 110840860 |
| rs1980977 | COL18A1   | AG | 46816019  |
| rs1980983 | COL6A2    | AG | 47558994  |
| rs1981316 | COL4A1    | AC | 110851808 |
| rs1982963 | NID2      | AG | 52509101  |
| rs1983931 | COL4A2    | AG | 111118102 |
| rs1990950 | ADAM19    | GT | 156920756 |
| rs1990951 | ADAM19    | CT | 156920911 |
| rs1992898 | ITGAV     | AG | 187491140 |
| rs1993392 | COL14A1   | AG | 121240646 |
| rs1995126 | TLL1      | AG | 167014137 |
| rs1996223 | COL23A1   | AG | 177916502 |
| rs1998207 | SERPINA12 | GT | 94957714  |
| rs2003241 | TIMP2     | CT | 76885117  |
| rs2010221 | TNN       | CT | 175093867 |
| rs2011616 | EMILIN1   | AG | 27302561  |
| rs2016518 | FBLN1     | AG | 45983901  |
| rs2018072 | FBLN1     | AG | 45918491  |

|           |           |      |           |
|-----------|-----------|------|-----------|
| rs2019185 | CILP      | AG   | 65500435  |
| rs2021783 | TNXB      | CT   | 32044851  |
| rs2022161 | ADAM22    | GT   | 87639968  |
| rs2023533 | ADAM22    | AG   | 87634515  |
| rs2025405 | POSTN     | CT   | 38170523  |
| rs2025453 | TLL2      | AC   | 98231449  |
| rs2026882 | ITGB2     | CT   | 46322853  |
| rs2026886 | COL18A1   | AC   | 46830873  |
| rs2027084 | LAMC1     | AG   | 183110801 |
| rs2029137 | PLOD2     | AG   | 145798787 |
| rs2029356 | TGFBR3    | CT   | 92209311  |
| rs2029980 | NID2      | AC   | 52501235  |
| rs2029981 | NID2      | CT   | 52501214  |
| rs2031014 | SPON1     | CT   | 14051977  |
| rs2032568 | LAMA4     | AG   | 112457471 |
| rs2033204 | COL23A1   | CT   | 177707204 |
| rs2033316 | EFEMP1    | AG   | 56140531  |
| rs2033467 | SPARC     | CT   | 151039626 |
| rs2034843 | COL14A1   | AG   | 121343774 |
| rs2035265 | ITGB5     | GT   | 124488610 |
| rs2038498 | SERPINA12 | CT   | 94952404  |
| rs2041009 | ADAM22    | AG   | 87763113  |
| rs2045819 | COL11A1   | CT   | 103400314 |
| rs2046736 | TGFBR3    | CT   | 92175008  |
| rs2050601 | COL11A1   | AG   | 103498029 |
| rs2051616 | FBLN1     | AG   | 45963523  |
| rs2051649 | LAMA4     | AG   | 112490531 |
| rs2052204 | FBLN5     | AG   | 92330819  |
| rs2061052 | MATN2     | CT   | 99053025  |
| rs2061054 | MATN2     | AG   | 98994851  |
| rs2061516 | TLL1      | CT   | 166801301 |
| rs2061705 | COL11A1   | ACGT | 103441814 |
| rs2067986 | COL15A1   | CT   | 101816399 |
| rs2070682 | SERPINE1  | CT   | 100777267 |
| rs2070739 | COL2A1    | CT   | 48367976  |
| rs2070871 | P4HB      | AG   | 79805134  |
| rs2070947 | ITGB2     | AG   | 46340843  |
| rs2071232 | MMP1      | CT   | 102665669 |
| rs2071295 | TNXB      | CT   | 32038700  |
| rs2071307 | ELN       | AG   | 73470714  |
| rs2071358 | COL2A1    | GT   | 48366449  |
| rs2071869 | FBLN1     | AG   | 45972551  |
| rs2071870 | FBLN1     | AG   | 45972610  |
| rs2071871 | FBLN1     | AG   | 45996110  |
| rs2071938 | FBLN1     | CT   | 45931262  |
| rs2071947 | TIMP3     | CT   | 33246032  |
| rs2072020 | LAMA4     | AG   | 112460648 |
| rs2072024 | LAMA4     | CT   | 112558763 |



|           |           |    |           |
|-----------|-----------|----|-----------|
| rs2072026 | LAMA4     | CT | 112463076 |
| rs2072038 | TNN       | CT | 175105778 |
| rs2072040 | TNN       | AG | 175096333 |
| rs2072041 | TNN       | CT | 175092840 |
| rs2072168 | PLOD3     | GT | 100861870 |
| rs2072209 | LAMB1     | AG | 107592198 |
| rs2072793 | MATN4     | AG | 43941226  |
| rs2073479 | BGN       | CT | 152772473 |
| rs2073622 | NID2      | AG | 52500178  |
| rs2073625 | NID2      | CT | 52488688  |
| rs2073711 | CILP      | AG | 65494212  |
| rs2074685 | PLOD3     | CT | 100862264 |
| rs2074811 | TGFBI     | CT | 135391947 |
| rs2075664 | COL15A1   | AC | 101749498 |
| rs2075666 | COL15A1   | CT | 101798002 |
| rs2076023 | MATN4     | AG | 43929659  |
| rs2076722 | ITGB5     | CT | 124547871 |
| rs2077911 | SERPINA12 | CT | 94983224  |
| rs2078114 | ADAM12    | CT | 127776336 |
| rs2083425 | ITGB5     | GT | 124496888 |
| rs2085144 | MATN2     | AG | 98953076  |
| rs2093558 | TLL2      | AC | 98140048  |
| rs2101575 | LAMA2     | AC | 129616516 |
| rs2101919 | NID2      | CT | 52520368  |
| rs2107331 | TGFBI     | AC | 135377349 |
| rs2107349 | AZGP1     | CT | 99558440  |
| rs2118181 | FBN1      | CT | 48915884  |
| rs2124471 | COL14A1   | AC | 121179997 |
| rs2126642 | COL11A1   | AG | 103405793 |
| rs2126643 | COL11A1   | CT | 103404384 |
| rs2129975 | TGFBR3    | GT | 92282080  |
| rs2131939 | COL4A1    | AG | 110831837 |
| rs2141831 | COL4A3    | CT | 228087689 |
| rs2147060 | OGN       | CT | 95160477  |
| rs2150101 | TNC       | AC | 117812891 |
| rs2151616 | COL15A1   | AG | 101729103 |
| rs2153875 | ITGB1     | AC | 33190567  |
| rs2154203 | TLL2      | AG | 98212575  |
| rs2156507 | NPNT      | CT | 106913997 |
| rs2158836 | LAMB1     | AG | 107580839 |
| rs2160079 | FBLN5     | AC | 92374405  |
| rs2160080 | FBLN5     | GT | 92374487  |
| rs2161396 | ADAM19    | AC | 156868224 |
| rs2162765 | COL23A1   | CT | 177744380 |
| rs2164072 | ITGB2     | AC | 46301008  |
| rs2165241 | LOXL1     | CT | 74222202  |
| rs2169076 | ADAM12    | CT | 127849127 |
| rs2169501 | SPARCL1   | AG | 88461636  |

|           |           |    |           |
|-----------|-----------|----|-----------|
| rs2176621 | FBLN2     | GT | 13665410  |
| rs2178242 | SPON1     | CT | 14097139  |
| rs2183589 | COL18A1   | CT | 46821491  |
| rs2197787 | ITGAV     | GT | 187490371 |
| rs2198747 | COL14A1   | CT | 121310102 |
| rs2198751 | COL14A1   | CT | 121180667 |
| rs2204862 | COL4A3    | AG | 228052600 |
| rs2207216 | DPT       | AC | 168694212 |
| rs2213842 | LAMA4     | AG | 112423810 |
| rs2227275 | MATN4     | CT | 43926573  |
| rs2227631 | SERPINE1  | AG | 100769538 |
| rs2227672 | SERPINE1  | GT | 100775686 |
| rs2227684 | SERPINE1  | AG | 100776931 |
| rs2228331 | GPC1      | AG | 241405528 |
| rs2229783 | COL11A1   | AG | 103352451 |
| rs2235133 | ITGB2     | CT | 46321172  |
| rs2236240 | SERPINA12 | CT | 94960876  |
| rs2236241 | SERPINA12 | AG | 94960149  |
| rs2236409 | TNC       | AC | 117821746 |
| rs2236451 | COL18A1   | AG | 46876083  |
| rs2236459 | COL18A1   | AG | 46897079  |
| rs2236462 | COL18A1   | CT | 46897221  |
| rs2236470 | COL18A1   | AG | 46903021  |
| rs2236472 | COL18A1   | CT | 46903412  |
| rs2236475 | COL18A1   | AG | 46915042  |
| rs2236479 | COL18A1   | AG | 46919132  |
| rs2236483 | COL18A1   | CT | 46926054  |
| rs2236490 | COL6A2    | AC | 47512330  |
| rs2237238 | LAMA4     | AC | 112514717 |
| rs2237244 | LAMA4     | CT | 112524506 |
| rs2237247 | LAMA4     | AG | 112529849 |
| rs2237248 | LAMA4     | AG | 112538465 |
| rs2237538 | ADAM22    | AG | 87625967  |
| rs2237541 | ADAM22    | CT | 87731692  |
| rs2237686 | LAMB1     | CT | 107575162 |
| rs2237687 | LAMB1     | CT | 107585473 |
| rs2237690 | LAMB1     | CT | 107586254 |
| rs2237701 | LAMB1     | AG | 107622150 |
| rs2238810 | FBLN1     | AG | 45912376  |
| rs2239400 | FBLN1     | CT | 45936264  |
| rs2239689 | TNXB      | AG | 32030284  |
| rs2239844 | FBLN1     | AG | 45927112  |
| rs2241579 | COL23A1   | GT | 177669413 |
| rs2241581 | COL23A1   | CT | 177668882 |
| rs2242278 | SPON2     | AG | 1165516   |
| rs2242295 | MMP19     | AG | 56232176  |
| rs2244008 | LAMA2     | AG | 129813053 |
| rs2244554 | MATN2     | AG | 98963242  |

|           |         |    |           |
|-----------|---------|----|-----------|
| rs2246416 | FBLN5   | AG | 92390620  |
| rs2248014 | MATN2   | CT | 99030280  |
| rs2248052 | FBLN5   | CT | 92352114  |
| rs2249956 | LAMB1   | CT | 107641616 |
| rs2250509 | CHI3L1  | AG | 203138970 |
| rs2254320 | FBLN5   | AG | 92371141  |
| rs2255317 | MATN2   | CT | 99044528  |
| rs2255464 | MATN2   | AC | 99045978  |
| rs2256367 | MATN2   | CT | 98930457  |
| rs2266862 | BGN     | CT | 152764518 |
| rs2267184 | TIMP3   | CT | 33258050  |
| rs2267994 | FBLN5   | AG | 92356946  |
| rs2268578 | LUM     | AG | 91501198  |
| rs2269426 | TNXB    | AG | 32076499  |
| rs2269429 | TNXB    | CT | 32029183  |
| rs2269646 | LAMA4   | CT | 112511852 |
| rs2271649 | ADAM12  | AG | 127702393 |
| rs2272023 | ACAN    | AC | 89391160  |
| rs2273289 | PLOD1   | CT | 12018290  |
| rs2273429 | NID2    | AG | 52494072  |
| rs2273431 | NID2    | CT | 52496407  |
| rs2273779 | PRG4    | CT | 186273994 |
| rs2274545 | COL4A2  | AC | 111145310 |
| rs2276108 | MMP10   | CT | 102647536 |
| rs2276338 | ADAM17  | CT | 9645789   |
| rs2276454 | COL2A1  | AG | 48376291  |
| rs2276747 | FBLN2   | AG | 13649762  |
| rs2277027 | ADAM19  | AC | 156932376 |
| rs2277084 | LAMA4   | CT | 112476210 |
| rs2277814 | COL6A1  | AG | 47409503  |
| rs2277887 | EFEMP1  | CT | 56145541  |
| rs2277968 | COL5A3  | CT | 10071669  |
| rs2278230 | COL23A1 | CT | 177690539 |
| rs2279119 | MATN2   | CT | 99046298  |
| rs2279120 | MATN2   | CT | 99046040  |
| rs2279455 | TGFBR3  | CT | 92185185  |
| rs2279531 | CCDC80  | CT | 112356770 |
| rs2279723 | TLL1    | AC | 167022359 |
| rs2280261 | GPC1    | CT | 241408125 |
| rs2280305 | FBLN2   | CT | 13660809  |
| rs2280465 | ACAN    | AG | 89417629  |
| rs2281973 | COL4A2  | CT | 111130674 |
| rs2282117 | COL18A1 | GT | 46889666  |
| rs2282636 | EMILIN2 | CT | 2921777   |
| rs2282791 | TGFBI   | GT | 135377730 |
| rs2282854 | LAMA4   | CT | 112531660 |
| rs2283017 | AZGP1   | AG | 99574758  |
| rs2283657 | FBLN1   | AG | 45910152  |

|           |         |    |           |
|-----------|---------|----|-----------|
| rs2283663 | FBLN1   | AG | 45941476  |
| rs2283885 | TIMP3   | AG | 33248902  |
| rs2284337 | FBLN5   | AG | 92340722  |
| rs2284339 | FBLN5   | AG | 92340901  |
| rs2284340 | FBLN5   | CT | 92389047  |
| rs2284341 | FBLN5   | AC | 92389114  |
| rs2285182 | FBLN1   | CT | 45938846  |
| rs2286024 | COL2A1  | AG | 48360620  |
| rs2286025 | COL2A1  | CT | 48359984  |
| rs2287749 | ADAM19  | CT | 156918850 |
| rs2287802 | COL5A3  | AG | 10112688  |
| rs2287807 | COL5A3  | CT | 10097667  |
| rs2287808 | COL5A3  | CT | 10097593  |
| rs2287810 | COL5A3  | CT | 10087200  |
| rs2287926 | VCAN    | AG | 82815408  |
| rs2288810 | SPARC   | AG | 151045061 |
| rs2289136 | FBN1    | AG | 48944272  |
| rs2289200 | FN1     | AC | 216232978 |
| rs2290192 | FBLN2   | CT | 13671758  |
| rs2290471 | MATN2   | AG | 98943545  |
| rs2290472 | MATN2   | CT | 98943598  |
| rs2290519 | COL14A1 | CT | 121244066 |
| rs2290523 | COL14A1 | AG | 121354851 |
| rs2290524 | COL14A1 | AG | 121354962 |
| rs2290673 | VCAN    | AG | 82850631  |
| rs2291081 | ITGB5   | AG | 124485235 |
| rs2291084 | ITGB5   | AG | 124488185 |
| rs2291090 | ITGB5   | AC | 124515646 |
| rs2291794 | COL6A3  | AG | 238322579 |
| rs2291795 | COL6A3  | CT | 238253065 |
| rs2292013 | VCAN    | AC | 82792625  |
| rs2292082 | TLL1    | AG | 166996347 |
| rs2292305 | THBS1   | AG | 39880822  |
| rs2292832 | GPC1    | CT | 241395503 |
| rs2296620 | TGFBR3  | AG | 92174563  |
| rs2296621 | TGFBR3  | GT | 92163786  |
| rs2296845 | COL4A2  | GT | 111100947 |
| rs2296851 | COL4A2  | AG | 111138255 |
| rs2297179 | TNC     | GT | 117810250 |
| rs2297181 | TNC     | CT | 117810036 |
| rs2297602 | COL15A1 | CT | 101788522 |
| rs2297740 | LAMA2   | AG | 129835814 |
| rs2297741 | LAMA2   | AG | 129785282 |
| rs2299189 | ADAM22  | CT | 87570995  |
| rs2299204 | ADAM22  | CT | 87794452  |
| rs2299205 | ADAM22  | CT | 87794707  |
| rs2299418 | COL1A2  | AG | 94032325  |
| rs2300792 | COL12A1 | CT | 75859635  |

|           |         |    |           |
|-----------|---------|----|-----------|
| rs2300795 | COL12A1 | AG | 75825181  |
| rs2301994 | ELN     | AG | 73452263  |
| rs2301995 | ELN     | AG | 73452140  |
| rs2302038 | TGFBI   | CT | 135397018 |
| rs2303099 | COL5A3  | GT | 10116375  |
| rs2303500 | FBN1    | AG | 48739274  |
| rs2303505 | FBN1    | GT | 48712757  |
| rs2303973 | SPON1   | AG | 14264916  |
| rs2303974 | SPON1   | AC | 14264979  |
| rs2303975 | SPON1   | AG | 14276999  |
| rs2304681 | EMILIN1 | AG | 27315252  |
| rs2304719 | LOXL1   | CT | 74235500  |
| rs2304721 | LOXL1   | AC | 74240354  |
| rs2305600 | COL14A1 | CT | 121215991 |
| rs2305605 | COL14A1 | AG | 121259862 |
| rs2305607 | COL14A1 | AG | 121262775 |
| rs2306887 | TGFBR3  | CT | 92200218  |
| rs2306942 | LAMA2   | AG | 129635800 |
| rs2311801 | DAG1    | AG | 49568095  |
| rs2326483 | COL14A1 | CT | 121211847 |
| rs2326761 | LAMA2   | AG | 129541597 |
| rs2333618 | LAMC1   | AG | 183121028 |
| rs2350310 | FBLN2   | CT | 13637116  |
| rs2366698 | ADAM12  | CT | 127975335 |
| rs2366705 | ADAM12  | CT | 128058851 |
| rs2372544 | FN1     | GT | 216264270 |
| rs2376280 | COL11A1 | AG | 103568464 |
| rs2376999 | TIMP2   | AG | 76890864  |
| rs2385057 | NID1    | AG | 236207358 |
| rs2391823 | COL4A1  | AG | 110944795 |
| rs2391824 | COL4A1  | AG | 110961282 |
| rs2391824 | COL4A2  | AG | 110961282 |
| rs2396463 | COL4A3  | AC | 228044992 |
| rs2397446 | MMP2    | CT | 55455664  |
| rs2403708 | SPON1   | AG | 14072663  |
| rs2408490 | MMP1    | CT | 102672553 |
| rs2430339 | FBLN5   | AG | 92335304  |
| rs2430340 | FBLN5   | AG | 92337774  |
| rs2430342 | FBLN5   | CT | 92344244  |
| rs2430343 | FBLN5   | CT | 92345665  |
| rs2430353 | FBLN5   | AC | 92355117  |
| rs2430363 | FBLN5   | AG | 92365051  |
| rs2430368 | FBLN5   | CT | 92387541  |
| rs2437089 | LAMA2   | CT | 129704589 |
| rs2437090 | LAMA2   | GT | 129717246 |
| rs2437094 | LAMA2   | AG | 129715399 |
| rs2437095 | LAMA2   | GT | 129715289 |
| rs2444860 | MATN2   | CT | 99052895  |

|           |        |    |           |
|-----------|--------|----|-----------|
| rs2444871 | MATN2  | CT | 98980663  |
| rs2444876 | MATN2  | CT | 98970756  |
| rs2444882 | MATN2  | AG | 98964771  |
| rs2444889 | MATN2  | AG | 98908198  |
| rs2444891 | MATN2  | CT | 99016723  |
| rs2444895 | MATN2  | CT | 99020949  |
| rs2444896 | MATN2  | AC | 99022009  |
| rs2444907 | MATN2  | CT | 98934748  |
| rs2448011 | LAMA2  | CT | 129592284 |
| rs2451688 | LAMA2  | AG | 129646565 |
| rs2459113 | ADAM12 | CT | 127745094 |
| rs2474028 | FBLN5  | CT | 92403660  |
| rs2475193 | ITGB1  | AG | 33272133  |
| rs2480933 | TNC    | CT | 117864609 |
| rs2482077 | TNC    | CT | 117851672 |
| rs2482078 | TNC    | AG | 117865376 |
| rs2483675 | LAMC1  | CT | 183118282 |
| rs2488314 | ITGB1  | AG | 33187464  |
| rs2488320 | ITGB1  | CT | 33198911  |
| rs2488326 | ITGB1  | CT | 33207497  |
| rs2488336 | ITGB1  | CT | 33236305  |
| rs2489188 | TGFBR3 | CT | 92332489  |
| rs2498828 | FBLN5  | CT | 92421275  |
| rs2498829 | FBLN5  | AG | 92375770  |
| rs2498845 | FBLN5  | GT | 92346858  |
| rs2498852 | FBLN5  | AG | 92416364  |
| rs2498854 | FBLN5  | GT | 92326415  |
| rs2512024 | MATN2  | CT | 98952826  |
| rs2512028 | MATN2  | CT | 98960813  |
| rs2512033 | MATN2  | AG | 98970479  |
| rs2512040 | MATN2  | AG | 98981529  |
| rs2512043 | MATN2  | CT | 98987918  |
| rs2512046 | MATN2  | AG | 98990399  |
| rs2513812 | MATN2  | GT | 99046942  |
| rs2513837 | MATN2  | CT | 98936151  |
| rs2513843 | MATN2  | CT | 98949206  |
| rs2513848 | MATN2  | AG | 98989071  |
| rs2513851 | MATN2  | AG | 99002078  |
| rs2513852 | MATN2  | AC | 99008727  |
| rs2521205 | COL1A2 | GT | 94046541  |
| rs2521206 | COL1A2 | AG | 94039187  |
| rs2527923 | AZGP1  | CT | 99567455  |
| rs2528648 | LAMB1  | AG | 107568599 |
| rs2528650 | LAMB1  | CT | 107600558 |
| rs2528651 | LAMB1  | CT | 107602624 |
| rs2540707 | MMP2   | AC | 55472551  |
| rs2540718 | MMP2   | AG | 55478556  |
| rs2540726 | MMP2   | AG | 55481111  |

|           |         |    |           |
|-----------|---------|----|-----------|
| rs2541312 | VCAN    | AG | 82819185  |
| rs2544408 | NPNT    | CT | 106808040 |
| rs2546629 | COL23A1 | AC | 177883242 |
| rs2546643 | COL23A1 | AG | 177964444 |
| rs2546645 | COL23A1 | CT | 177947771 |
| rs2553453 | NPNT    | AG | 106808172 |
| rs2571576 | LAMA2   | CT | 129834224 |
| rs2571577 | LAMA2   | CT | 129798084 |
| rs2571584 | LAMA2   | AG | 129803485 |
| rs2576561 | MMP2    | CT | 55470974  |
| rs2576562 | MMP2    | AG | 55466774  |
| rs2586488 | COL1A1  | AG | 48265426  |
| rs2586494 | COL1A1  | AC | 48273155  |
| rs2615977 | COL11A1 | AC | 103452392 |
| rs2616009 | COL11A1 | CT | 103409558 |
| rs2618164 | THBS1   | CT | 39863872  |
| rs2618516 | SPON1   | CT | 14021639  |
| rs2622839 | COL11A1 | CT | 103476179 |
| rs2622874 | COL11A1 | AC | 103466917 |
| rs2622878 | COL11A1 | GT | 103439819 |
| rs2630452 | FBLN2   | CT | 13571228  |
| rs2630453 | FBLN2   | CT | 13571802  |
| rs2645737 | NID2    | CT | 52513311  |
| rs2645743 | NID2    | CT | 52511878  |
| rs2645766 | COL6A3  | GT | 238257896 |
| rs2645772 | COL6A3  | AG | 238276385 |
| rs2645779 | COL6A3  | CT | 238311612 |
| rs2645782 | COL6A3  | AC | 238317822 |
| rs2645783 | COL6A3  | AG | 238319712 |
| rs2646254 | COL6A3  | CT | 238267717 |
| rs2646261 | COL6A3  | AG | 238259387 |
| rs2646262 | COL6A3  | CT | 238258280 |
| rs2646265 | COL6A3  | AG | 238257013 |
| rs2647691 | COL23A1 | CT | 177886182 |
| rs2652106 | VCAN    | GT | 82794036  |
| rs2672818 | COL23A1 | AG | 177932674 |
| rs2672824 | COL23A1 | CT | 177887732 |
| rs2672826 | COL23A1 | AG | 177954516 |
| rs2696247 | COL1A1  | AG | 48269903  |
| rs2696270 | COL1A1  | CT | 48257812  |
| rs2697823 | SPON1   | AG | 14080925  |
| rs2697827 | SPON1   | GT | 14090461  |
| rs2697828 | SPON1   | CT | 14090922  |
| rs2697832 | SPON1   | AG | 14100888  |
| rs2697846 | SPON1   | GT | 14002819  |
| rs2697852 | SPON1   | AG | 14022014  |
| rs2701034 | LAMB1   | AG | 107613379 |
| rs2701039 | LAMB1   | AG | 107623542 |

|           |         |    |           |
|-----------|---------|----|-----------|
| rs2731343 | FBLN2   | CT | 13564048  |
| rs2731647 | LOX     | AG | 121420426 |
| rs2741523 | MATN4   | CT | 43920446  |
| rs2743275 | MATN4   | AG | 43918591  |
| rs2743312 | MATN4   | AG | 43936155  |
| rs2749881 | NID2    | AG | 52515209  |
| rs2770186 | TGFBR3  | CT | 92378843  |
| rs2799512 | TGFBR3  | CT | 92309916  |
| rs2799537 | TGFBR3  | AG | 92293412  |
| rs2799541 | TGFBR3  | AG | 92355115  |
| rs2810891 | TGFBR3  | AG | 92154088  |
| rs2810893 | TGFBR3  | CT | 92144970  |
| rs2830585 | ADAMTS5 | CT | 28305212  |
| rs2830592 | ADAMTS5 | AG | 28345952  |
| rs2830593 | ADAMTS5 | AG | 28346179  |
| rs2830594 | ADAMTS5 | AG | 28348803  |
| rs2838730 | ITGB2   | AG | 46319492  |
| rs2838733 | ITGB2   | CT | 46323731  |
| rs2838734 | ITGB2   | CT | 46329740  |
| rs2838735 | ITGB2   | CT | 46335282  |
| rs2838737 | ITGB2   | CT | 46335580  |
| rs2838738 | ITGB2   | AG | 46344426  |
| rs2838906 | COL18A1 | CT | 46821907  |
| rs2838913 | COL18A1 | AG | 46837709  |
| rs2838917 | COL18A1 | CT | 46839904  |
| rs2838922 | COL18A1 | CT | 46846015  |
| rs2838923 | COL18A1 | AG | 46846944  |
| rs2838927 | COL18A1 | CT | 46848326  |
| rs2838942 | COL18A1 | AG | 46904833  |
| rs2838950 | COL18A1 | CT | 46926297  |
| rs2839108 | COL6A2  | CT | 47535248  |
| rs2839110 | COL6A2  | AG | 47538960  |
| rs2839112 | COL6A2  | CT | 47544388  |
| rs2839116 | COL6A2  | AC | 47548555  |
| rs2839117 | COL6A2  | AG | 47550754  |
| rs2840140 | COL23A1 | CT | 177892347 |
| rs2856728 | ELN     | CT | 73470782  |
| rs2861580 | TLL2    | AG | 98208287  |
| rs2861583 | TLL2    | CT | 98209983  |
| rs2869678 | SPARCL1 | AG | 88433880  |
| rs2876021 | LAMA2   | AG | 129509207 |
| rs2876038 | LAMA2   | AG | 129561742 |
| rs2877453 | MATN2   | AC | 99055222  |
| rs2882676 | ACAN    | AC | 89400339  |
| rs2884289 | PDIA6   | AG | 10959724  |
| rs2887831 | ITGAV   | CT | 187541810 |
| rs2889529 | TIMP2   | AG | 76897475  |
| rs2895219 | ECM2    | CT | 95300559  |



|           |         |    |           |
|-----------|---------|----|-----------|
| rs2899292 | LGALS1  | AG | 38077718  |
| rs2899417 | FBN1    | CT | 48700103  |
| rs2901990 | TLL2    | AG | 98120109  |
| rs2910111 | COL23A1 | CT | 177793761 |
| rs2910119 | COL23A1 | AG | 177798295 |
| rs2913756 | COL23A1 | CT | 177725276 |
| rs2913766 | COL23A1 | CT | 177735777 |
| rs2913774 | COL23A1 | CT | 177739628 |
| rs2913779 | COL23A1 | AG | 177743772 |
| rs2913784 | COL23A1 | AG | 177749643 |
| rs2913788 | COL23A1 | AC | 177757764 |
| rs2913810 | COL23A1 | AG | 177779994 |
| rs2913818 | COL23A1 | AG | 177719916 |
| rs2913844 | COL23A1 | CT | 177692247 |
| rs2913847 | COL23A1 | CT | 177684682 |
| rs2913851 | COL23A1 | CT | 177675217 |
| rs2913861 | COL23A1 | CT | 177659075 |
| rs2930121 | ADAM12  | AG | 127874740 |
| rs2930125 | ADAM12  | CT | 127889157 |
| rs2959646 | MATN2   | CT | 98935189  |
| rs2967890 | CALR    | AG | 13040647  |
| rs2973675 | COL23A1 | CT | 177762425 |
| rs2973677 | COL23A1 | AG | 177761336 |
| rs2973689 | COL23A1 | GT | 177754580 |
| rs2973696 | COL23A1 | AG | 177748144 |
| rs2973713 | COL23A1 | CT | 177796121 |
| rs2973719 | COL23A1 | CT | 177801274 |
| rs2973725 | COL23A1 | AG | 177804032 |
| rs2973737 | COL23A1 | AG | 177815313 |
| rs2973739 | COL23A1 | CT | 177820134 |
| rs2973741 | COL23A1 | AG | 177821665 |
| rs2973742 | COL23A1 | AG | 177830769 |
| rs2973765 | COL23A1 | CT | 177707427 |
| rs2973775 | COL23A1 | AG | 177717723 |
| rs2973776 | COL23A1 | CT | 177718517 |
| rs2973808 | COL23A1 | CT | 177766580 |
| rs2974754 | CALR    | CT | 13061983  |
| rs2979860 | LOX     | AG | 121421864 |
| rs2980042 | BGN     | AG | 152755269 |
| rs2980060 | BGN     | AC | 152779715 |
| rs2985159 | POSTN   | GT | 38176489  |
| rs3087657 | PDIA3   | AG | 44063859  |
| rs3088026 | COL6A2  | CT | 47549613  |
| rs3096169 | VCAN    | AG | 82831964  |
| rs3106796 | COL3A1  | AG | 189849773 |
| rs3109676 | COL5A1  | AG | 137631198 |
| rs3109678 | COL5A1  | AC | 137625142 |
| rs3109687 | COL5A1  | GT | 137599992 |

|           |         |    |           |
|-----------|---------|----|-----------|
| rs3124297 | COL5A1  | AG | 137616715 |
| rs3124300 | COL5A1  | AG | 137619862 |
| rs3124929 | COL5A1  | CT | 137667432 |
| rs3124932 | COL5A1  | CT | 137672012 |
| rs3124934 | COL5A1  | CT | 137678038 |
| rs3128570 | COL5A1  | AG | 137743309 |
| rs3128575 | COL5A1  | CT | 137736650 |
| rs3128591 | COL5A1  | AG | 137602119 |
| rs3128597 | COL5A1  | AC | 137620847 |
| rs3128606 | COL5A1  | CT | 137622923 |
| rs3128615 | COL5A1  | AG | 137641411 |
| rs3128621 | COL5A1  | GT | 137678306 |
| rs3134954 | TNXB    | CT | 32071893  |
| rs3138189 | DCN     | CT | 91565694  |
| rs3138190 | DCN     | GT | 91565527  |
| rs3138196 | DCN     | AG | 91564481  |
| rs3138209 | DCN     | CT | 91561165  |
| rs3138287 | DCN     | AC | 91540432  |
| rs3210714 | SPARC   | CT | 151041932 |
| rs3213190 | NID1    | CT | 236141174 |
| rs3731663 | MATN3   | CT | 20189089  |
| rs3731667 | MATN3   | AC | 20205197  |
| rs3734031 | ADAM19  | AG | 156940760 |
| rs3734034 | ADAM19  | CT | 156821217 |
| rs3734287 | LAMA4   | CT | 112454245 |
| rs3735602 | LAMB1   | AG | 107563586 |
| rs3736487 | COL3A1  | AG | 189855943 |
| rs3736638 | COL1A2  | AC | 94047266  |
| rs3738441 | TGFBR3  | CT | 92224067  |
| rs3738525 | NID1    | AG | 236144951 |
| rs3738919 | ITGAV   | AC | 187521260 |
| rs3739799 | COL15A1 | CT | 101784777 |
| rs3742188 | COL4A2  | AG | 111175244 |
| rs3742207 | COL4A1  | GT | 110818598 |
| rs3742536 | NID2    | AG | 52507429  |
| rs3743110 | PPIB    | AG | 64462463  |
| rs3743398 | ACAN    | CT | 89398407  |
| rs3744477 | ADAM11  | AG | 42827673  |
| rs3744787 | TIMP2   | AG | 76893671  |
| rs3745013 | EMILIN2 | AG | 2915219   |
| rs3745582 | COL5A3  | AC | 10077158  |
| rs3745596 | COL5A3  | CT | 10108929  |
| rs3746972 | ITGB2   | AG | 46327835  |
| rs3749282 | PLOD2   | CT | 145783440 |
| rs3749782 | TGFBI   | AG | 135398279 |
| rs3750255 | COL14A1 | AG | 121267736 |
| rs3751488 | MMP14   | AG | 23304094  |
| rs3753019 | COL18A1 | CT | 46924785  |

|           |         |    |           |
|-----------|---------|----|-----------|
| rs3753103 | ADAM22  | CT | 87735798  |
| rs3753579 | PLOD1   | AG | 12038591  |
| rs3753841 | COL11A1 | AG | 103379918 |
| rs3754021 | TGFBR3  | CT | 92158751  |
| rs3754237 | NID1    | AG | 236177182 |
| rs3755724 | TIMP4   | CT | 12200906  |
| rs3758314 | COL15A1 | CT | 101702439 |
| rs3758419 | ADAM12  | CT | 127784884 |
| rs3758420 | ADAM12  | CT | 127784936 |
| rs3760386 | CNTNAP1 | AG | 40842084  |
| rs3762096 | TLL2    | AG | 98136250  |
| rs3763392 | SPARCL1 | AC | 88415884  |
| rs3763468 | COL1A2  | AG | 94021546  |
| rs3765087 | ADAM15  | AC | 155029253 |
| rs3765160 | COL3A1  | AG | 189868381 |
| rs3766550 | CHI3L1  | GT | 203141689 |
| rs3766551 | CHI3L1  | CT | 203141592 |
| rs3768622 | LAMC1   | AG | 183090011 |
| rs3768781 | ITGAV   | AG | 187481835 |
| rs3772823 | ITGB5   | CT | 124491517 |
| rs3772832 | ITGB5   | AG | 124515876 |
| rs3772836 | ITGB5   | AC | 124535635 |
| rs3772839 | ITGB5   | CT | 124539303 |
| rs3772841 | ITGB5   | AC | 124554130 |
| rs3772845 | ITGB5   | CT | 124560890 |
| rs3773255 | FBLN2   | CT | 13672732  |
| rs3773271 | FBLN2   | CT | 13646818  |
| rs3773276 | FBLN2   | AG | 13639259  |
| rs3773281 | FBLN2   | CT | 13630819  |
| rs3773282 | FBLN2   | CT | 13630307  |
| rs3773283 | FBLN2   | CT | 13626592  |
| rs3773300 | FBLN2   | CT | 13614411  |
| rs3773364 | TIMP4   | AG | 12189968  |
| rs3775110 | SPON2   | AG | 1162022   |
| rs3777505 | COL12A1 | AC | 75880623  |
| rs3777510 | COL12A1 | CT | 75902804  |
| rs3777925 | LAMA4   | AG | 112526101 |
| rs3777926 | LAMA4   | CT | 112526025 |
| rs3777932 | LAMA4   | AG | 112515430 |
| rs3777947 | LAMA4   | CT | 112433664 |
| rs3778112 | LAMA2   | CT | 129609591 |
| rs3778119 | LAMA2   | AG | 129590111 |
| rs3778135 | LAMA2   | AC | 129507909 |
| rs3778141 | LAMA2   | CT | 129466298 |
| rs3780622 | COL15A1 | AG | 101763633 |
| rs3780873 | ITGB1   | AG | 33213680  |
| rs3781001 | ADAM12  | CT | 127706028 |
| rs3781013 | ADAM12  | AG | 127764148 |

|           |          |    |           |
|-----------|----------|----|-----------|
| rs3781031 | ADAM12   | AG | 127783034 |
| rs3783101 | COL4A1   | AG | 110871312 |
| rs3783106 | COL4A1   | GT | 110842153 |
| rs3783113 | COL4A1   | CT | 110834746 |
| rs3783632 | NID2     | AC | 52498111  |
| rs3783937 | FBLN5    | CT | 92407693  |
| rs3784381 | PPIB     | GT | 64449839  |
| rs3784390 | THBS1    | AG | 39871080  |
| rs3784759 | ACAN     | CT | 89383044  |
| rs3785529 | LGALS3BP | CT | 76972960  |
| rs3786701 | COL5A3   | CT | 10124504  |
| rs3788142 | ITGB2    | AG | 46316640  |
| rs3788145 | ITGB2    | CT | 46317126  |
| rs3788150 | ITGB2    | GT | 46333802  |
| rs3788151 | ITGB2    | CT | 46337565  |
| rs3788190 | COL18A1  | AG | 46936958  |
| rs3788654 | FBLN1    | AG | 45971490  |
| rs3788658 | FBLN1    | AG | 45980298  |
| rs3788662 | FBLN1    | CT | 45981447  |
| rs3788667 | FBLN1    | AC | 45982830  |
| rs3789236 | ADAM22   | CT | 87820419  |
| rs3789867 | TNC      | AC | 117875688 |
| rs3789868 | TNC      | CT | 117875681 |
| rs3789875 | TNC      | AC | 117795288 |
| rs3789945 | TLL2     | CT | 98152036  |
| rs3789950 | TLL2     | CT | 98162791  |
| rs3789955 | TLL2     | AG | 98205419  |
| rs3790995 | COL6A3   | AG | 238259675 |
| rs3790998 | COL6A3   | AC | 238260610 |
| rs3791679 | EFEMP1   | AG | 56096892  |
| rs3795965 | MATN3    | AG | 20199089  |
| rs3803229 | COL4A2   | AG | 111134780 |
| rs3803231 | COL4A2   | CT | 111119342 |
| rs3803237 | COL4A2   | AG | 111117668 |
| rs3804665 | PLOD2    | GT | 145808330 |
| rs3806256 | ADAM15   | CT | 155035611 |
| rs3810068 | EMILIN2  | CT | 2846499   |
| rs3810631 | FBLN1    | CT | 45897997  |
| rs3810632 | FBLN1    | CT | 45898074  |
| rs3810875 | ADAM22   | AC | 87820986  |
| rs3811149 | COL5A1   | AG | 137708803 |
| rs3811157 | COL5A1   | CT | 137690953 |
| rs3811158 | COL5A1   | CT | 137690877 |
| rs3811159 | COL5A1   | AG | 137688657 |
| rs3811624 | GPC1     | CT | 241409456 |
| rs3814221 | TLL2     | CT | 98127590  |
| rs3814474 | LAMB1    | CT | 107644808 |
| rs3814835 | FBLN5    | CT | 92414380  |

|           |         |    |           |
|-----------|---------|----|-----------|
| rs3815746 | COL5A3  | CT | 10079093  |
| rs3816375 | ITGAV   | AG | 187505486 |
| rs3816411 | FBLN2   | CT | 13677751  |
| rs3816665 | LAMA2   | AG | 129571330 |
| rs3817004 | TIMP4   | AG | 12195674  |
| rs3820182 | PRG4    | AG | 186290333 |
| rs3820558 | NID1    | AC | 236144754 |
| rs3821536 | ITGB5   | CT | 124483952 |
| rs3822585 | ADAM19  | AG | 156906986 |
| rs3822696 | ADAM19  | CT | 156957741 |
| rs3824511 | COL15A1 | CT | 101816552 |
| rs3824637 | ADAM12  | AG | 127740389 |
| rs3825478 | COL4A1  | AG | 110836472 |
| rs3825481 | COL4A1  | CT | 110806852 |
| rs3825594 | NID2    | AG | 52507206  |
| rs3826638 | EMILIN2 | CT | 2891847   |
| rs3827848 | COL5A1  | AG | 137707834 |
| rs3827851 | COL5A1  | GT | 137694369 |
| rs3828134 | COL6A3  | AG | 238260797 |
| rs3828240 | EFEMP1  | CT | 56125319  |
| rs3828334 | GPC1    | AG | 241390002 |
| rs3829364 | POSTN   | CT | 38174533  |
| rs3847470 | ADAM12  | GT | 128030244 |
| rs3850459 | COL11A1 | CT | 103517428 |
| rs3853401 | LOX     | AG | 121417687 |
| rs3856465 | PDIA6   | AG | 10916670  |
| rs3857979 | BMP1    | CT | 22055348  |
| rs3858316 | ADAM12  | AG | 127927283 |
| rs3858320 | ADAM12  | AG | 127978792 |
| rs3863065 | ITGB5   | GT | 124550191 |
| rs3866330 | DAG1    | CT | 49582994  |
| rs3870336 | DAG1    | AG | 49557857  |
| rs3886934 | MMP2    | AG | 55446764  |
| rs3892767 | ADAM12  | CT | 128041169 |
| rs3911239 | ITGAV   | CT | 187470311 |
| rs3918261 | MMP9    | AG | 44643592  |
| rs3918278 | MMP9    | AG | 44635654  |
| rs3920038 | NID2    | GT | 52535648  |
| rs3922914 | COL5A1  | CT | 137598731 |
| rs3924229 | BMP1    | AG | 22049892  |
| rs3924462 | DAG1    | GT | 49524236  |
| rs3925075 | ITGAM   | AG | 31347748  |
| rs3929758 | COL4A2  | AC | 111082157 |
| rs3930345 | VCAN    | CT | 82881255  |
| rs3933239 | MMP9    | AC | 44628668  |
| rs3935335 | COL5A1  | AG | 137596166 |
| rs3943300 | LAMA2   | CT | 129454510 |
| rs3995780 | ADAM12  | CT | 128011731 |

|           |         |    |           |
|-----------|---------|----|-----------|
| rs4043263 | ADAM11  | AG | 42860326  |
| rs4045192 | ADAM15  | CT | 155038756 |
| rs4072037 | THBS3   | CT | 155162067 |
| rs4072077 | COL5A1  | GT | 137677489 |
| rs4073904 | COL4A3  | AG | 228161915 |
| rs4075478 | BMP1    | CT | 22053123  |
| rs4076090 | LAMA2   | AG | 129351484 |
| rs4077920 | MATN2   | AC | 98893864  |
| rs4129319 | SPARCL1 | CT | 88395385  |
| rs4141663 | ITGB5   | CT | 124551967 |
| rs4143750 | LAMA2   | AG | 129734028 |
| rs4145072 | COL4A1  | CT | 110899955 |
| rs4233366 | ADAMTS4 | CT | 161159147 |
| rs4233367 | ADAMTS4 | CT | 161163037 |
| rs4233964 | EFEMP1  | CT | 56135497  |
| rs4234222 | ITGB5   | AG | 124584787 |
| rs4240702 | COL5A1  | CT | 137595859 |
| rs4240703 | COL5A1  | AG | 137595928 |
| rs4242430 | BMP1    | AC | 22067769  |
| rs4246818 | COL23A1 | AC | 177798187 |
| rs4255644 | COL4A2  | AG | 111089573 |
| rs4255736 | FBN1    | AC | 48728291  |
| rs4260765 | LAMA2   | CT | 129217305 |
| rs4263106 | COL4A3  | GT | 228092899 |
| rs4271760 | COL4A3  | AG | 228167544 |
| rs4279134 | LAMB2   | AG | 49156676  |
| rs4279641 | COL14A1 | AG | 121283832 |
| rs4280978 | LAMA2   | GT | 129619236 |
| rs4285344 | LAMA2   | AG | 129219050 |
| rs4290780 | CCDC80  | AG | 112335039 |
| rs4292545 | LAMA2   | AC | 129269412 |
| rs4325745 | COL4A3  | CT | 228057792 |
| rs4332918 | COL4A3  | AG | 228124702 |
| rs4335205 | COL5A1  | AG | 137552398 |
| rs4338381 | COL11A1 | AG | 103572927 |
| rs4340680 | CCDC80  | AC | 112332629 |
| rs4340795 | NPNT    | AG | 106861730 |
| rs4341231 | COL5A1  | CT | 137592961 |
| rs4342076 | PLOD2   | GT | 145888493 |
| rs4347830 | COL4A3  | AG | 228058016 |
| rs4349734 | COL23A1 | CT | 177845760 |
| rs4357054 | COL23A1 | AG | 177860454 |
| rs4360265 | MATN2   | CT | 98889153  |
| rs4361533 | COL23A1 | CT | 177851623 |
| rs4367177 | NPNT    | CT | 106921594 |
| rs4370848 | ADAM12  | AC | 128085524 |
| rs4390761 | COL4A3  | CT | 228156969 |
| rs4392253 | COL4A3  | AC | 228079100 |

|           |         |    |           |
|-----------|---------|----|-----------|
| rs4394301 | FKBP9   | AG | 33049584  |
| rs4405983 | SPARCL1 | CT | 88386769  |
| rs4407920 | COL14A1 | AG | 121141973 |
| rs4426386 | ADAM11  | AG | 42835495  |
| rs4428739 | COL5A1  | CT | 137736729 |
| rs4430946 | COL4A3  | CT | 228078708 |
| rs4431992 | MMP10   | CT | 102645399 |
| rs4433949 | COL6A3  | CT | 238249630 |
| rs4443524 | LAMA2   | AC | 129205288 |
| rs4447275 | COL4A2  | AG | 110982419 |
| rs4461027 | LOXL1   | CT | 74211548  |
| rs4461616 | ADAM19  | GT | 156981913 |
| rs4470745 | VCAN    | AG | 82789647  |
| rs4485771 | TLL1    | AG | 166893533 |
| rs4504708 | COL5A1  | GT | 137736544 |
| rs4512966 | COL4A2  | CT | 111082058 |
| rs4517640 | COL4A2  | CT | 111075916 |
| rs4528750 | COL4A3  | AC | 228058048 |
| rs4531123 | COL5A1  | AG | 137701553 |
| rs4534007 | LAMA2   | AG | 129373689 |
| rs4534508 | TLL2    | CT | 98282986  |
| rs4548258 | COL5A1  | CT | 137599444 |
| rs4559216 | MATN2   | AG | 98894110  |
| rs4563961 | COL5A1  | CT | 137670002 |
| rs4565825 | ADAM12  | AG | 127984277 |
| rs4569989 | LAMA2   | AG | 129408902 |
| rs4571602 | LAMA4   | AG | 112576955 |
| rs4575098 | ADAMTS4 | AG | 161155392 |
| rs4587680 | ITGB1   | CT | 33200782  |
| rs4588897 | COL14A1 | AG | 121139142 |
| rs4596126 | FBLN2   | AC | 13659897  |
| rs4596720 | COL5A1  | AG | 137587628 |
| rs4597836 | NPNT    | AC | 106888263 |
| rs4600917 | NPNT    | CT | 106829645 |
| rs4607021 | ITGB2   | AG | 46322487  |
| rs4610302 | SPARCL1 | AG | 88400110  |
| rs4616261 | CSPG4   | CT | 75965169  |
| rs4619602 | COL4A3  | CT | 228167014 |
| rs4631429 | MATN2   | AG | 98876595  |
| rs4642505 | LAMA2   | AG | 129642470 |
| rs4651138 | LAMC1   | AC | 183001312 |
| rs4651322 | TNN     | CT | 175104719 |
| rs4652769 | LAMC1   | CT | 183009196 |
| rs4656614 | DPT     | AG | 168691293 |
| rs4658260 | TGFBR3  | AG | 92184673  |
| rs4658265 | TGFBR3  | CT | 92240685  |
| rs4658269 | TGFBR3  | GT | 92247654  |
| rs4659618 | NID1    | AG | 236150459 |

|           |         |     |           |
|-----------|---------|-----|-----------|
| rs4659620 | NID1    | GT  | 236201609 |
| rs4660139 | NID1    | CT  | 236155817 |
| rs4660141 | NID1    | AG  | 236162592 |
| rs4660151 | NID1    | AG  | 236212899 |
| rs4663257 | COL6A3  | AG  | 238313196 |
| rs4663724 | COL6A3  | AC  | 238235082 |
| rs4663731 | COL6A3  | AG  | 238267058 |
| rs4667257 | COL3A1  | AG  | 189880810 |
| rs4669632 | PDIA6   | CT  | 10971017  |
| rs4669633 | PDIA6   | AG  | 10976790  |
| rs4675157 | COL4A3  | GT  | 228103702 |
| rs4675159 | COL4A3  | AG  | 228109347 |
| rs4675161 | COL4A3  | AG  | 228127807 |
| rs4678164 | ITGB5   | AG  | 124525071 |
| rs4678167 | ITGB5   | CT  | 124540832 |
| rs4678169 | ITGB5   | AC  | 124543103 |
| rs4681298 | PLOD2   | CT  | 145844373 |
| rs4682417 | CCDC80  | AG  | 112350156 |
| rs4684147 | FBLN2   | CT  | 13621532  |
| rs4690833 | TLL1    | GT  | 167016664 |
| rs4693829 | SPARCL1 | AC  | 88438011  |
| rs4693833 | SPARCL1 | GT  | 88445658  |
| rs4704742 | ADAM19  | CT  | 156891353 |
| rs4704863 | ADAM19  | CT  | 156879727 |
| rs4704869 | ADAM19  | AG  | 156898899 |
| rs4717865 | ELN     | AG  | 73454199  |
| rs4720087 | FKBP9   | AG  | 32995331  |
| rs4727007 | PDIA4   | AG  | 148709810 |
| rs4727695 | LAMB1   | AG  | 107614003 |
| rs4728730 | ADAM22  | CT  | 87704972  |
| rs4729129 | COL1A2  | AG  | 94015393  |
| rs4735508 | MATN2   | AG  | 98917811  |
| rs4735518 | MATN2   | GT  | 98991719  |
| rs4735521 | MATN2   | CT  | 99008015  |
| rs4743307 | COL15A1 | AG  | 101764212 |
| rs4743322 | COL15A1 | AC  | 101835165 |
| rs4756776 | SPON1   | AGT | 14224883  |
| rs4756782 | SPON1   | AC  | 14254606  |
| rs4760607 | COL2A1  | GT  | 48365265  |
| rs4760674 | COL2A1  | AC  | 48357014  |
| rs4771662 | COL4A1  | AG  | 110946729 |
| rs4771685 | COL4A2  | AG  | 111168951 |
| rs4773139 | COL4A1  | AG  | 110932193 |
| rs4773155 | COL4A2  | AC  | 110971066 |
| rs4773179 | COL4A2  | AG  | 111061884 |
| rs4773184 | COL4A2  | CT  | 111080231 |
| rs4773191 | COL4A2  | CT  | 111126501 |
| rs4773194 | COL4A2  | AG  | 111132490 |



|           |          |    |           |
|-----------|----------|----|-----------|
| rs4773200 | COL4A2   | CT | 111156021 |
| rs4773201 | COL4A2   | AG | 111156933 |
| rs4774517 | FBN1     | GT | 48759291  |
| rs4783891 | MMP2     | AG | 55457356  |
| rs4789863 | TIMP2    | CT | 76897347  |
| rs4789906 | LGALS3BP | AG | 76974752  |
| rs4789907 | LGALS3BP | AG | 76964309  |
| rs4789908 | LGALS3BP | CT | 76962059  |
| rs4789910 | LGALS3BP | GT | 76959898  |
| rs4789933 | TIMP2    | CT | 76923426  |
| rs4789936 | TIMP2    | CT | 76897974  |
| rs4789939 | TIMP2    | CT | 76881703  |
| rs4789940 | TIMP2    | AC | 76877671  |
| rs4796812 | TIMP2    | CT | 76875186  |
| rs4798032 | EMILIN2  | CT | 2854002   |
| rs4810482 | MMP9     | CT | 44634550  |
| rs4818817 | COL6A1   | AG | 47433055  |
| rs4818989 | ITGB2    | AG | 46356816  |
| rs4819095 | COL18A1  | CT | 46817380  |
| rs4819099 | COL18A1  | AG | 46834814  |
| rs4819119 | COL18A1  | AG | 46883153  |
| rs4819179 | COL6A1   | CT | 47419012  |
| rs4820294 | LGALS1   | AG | 38071043  |
| rs4841924 | COL5A1   | AG | 137587768 |
| rs4841926 | COL5A1   | CT | 137601285 |
| rs4841931 | COL5A1   | CT | 137705289 |
| rs4841934 | COL5A1   | CT | 137707942 |
| rs4842139 | COL5A1   | CT | 137563692 |
| rs4842145 | COL5A1   | CT | 137596949 |
| rs4842151 | COL5A1   | CT | 137646511 |
| rs4842152 | COL5A1   | AG | 137647009 |
| rs4842153 | COL5A1   | CT | 137647314 |
| rs4842157 | COL5A1   | AG | 137658608 |
| rs4842158 | COL5A1   | AG | 137658722 |
| rs4842161 | COL5A1   | AC | 137659688 |
| rs4842163 | COL5A1   | CT | 137662741 |
| rs4842167 | COL5A1   | CT | 137687314 |
| rs4842168 | COL5A1   | CT | 137691346 |
| rs4842169 | COL5A1   | AG | 137699002 |
| rs4842173 | COL5A1   | CT | 137718113 |
| rs4842174 | COL5A1   | CT | 137722311 |
| rs4845710 | ADAM15   | AG | 155033014 |
| rs4870723 | COL14A1  | AC | 121228679 |
| rs4870728 | COL14A1  | CT | 121386925 |
| rs4871046 | COL14A1  | CT | 121177395 |
| rs4871829 | COL14A1  | AG | 121081289 |
| rs4871830 | COL14A1  | AG | 121081936 |
| rs4872360 | BMP1     | CT | 22028668  |

|           |           |      |           |
|-----------|-----------|------|-----------|
| rs4886727 | CSPG4     | CT   | 75957375  |
| rs4886728 | CSPG4     | AG   | 75961518  |
| rs4886776 | LOXL1     | AG   | 74224996  |
| rs4886782 | LOXL1     | AG   | 74228810  |
| rs4889640 | ITGAM     | AC   | 31264267  |
| rs4895840 | LAMA2     | CT   | 129344023 |
| rs4895841 | LAMA2     | CT   | 129344194 |
| rs4895846 | LAMA2     | CT   | 129384367 |
| rs4897323 | LAMA2     | AC   | 129756916 |
| rs4897554 | CTGF      | AG   | 132262991 |
| rs4904827 | FBLN5     | CT   | 92401585  |
| rs4905211 | SERPINA12 | AG   | 94961888  |
| rs4919029 | TLL2      | AG   | 98274045  |
| rs4932432 | ACAN      | AC   | 89372601  |
| rs4932435 | ACAN      | GT   | 89384393  |
| rs4932438 | ACAN      | ACGT | 89397057  |
| rs4932439 | ACAN      | AG   | 89401109  |
| rs4947172 | LAMA4     | CT   | 112501537 |
| rs4947179 | LAMA4     | AC   | 112549164 |
| rs4958484 | SPARC     | AG   | 151052146 |
| rs4958486 | SPARC     | AC   | 151058334 |
| rs4958487 | SPARC     | AG   | 151063674 |
| rs4962318 | ADAM12    | AG   | 127741144 |
| rs4962322 | ADAM12    | AC   | 127932765 |
| rs4962333 | ADAM12    | CT   | 127971952 |
| rs4962510 | ADAM12    | AG   | 127850143 |
| rs4962514 | ADAM12    | AG   | 127881422 |
| rs4962553 | ADAM12    | GT   | 128086622 |
| rs4971100 | THBS3     | AG   | 155155731 |
| rs4974641 | SPON2     | AG   | 1174861   |
| rs4976725 | COL23A1   | CT   | 177876309 |
| rs4976733 | COL23A1   | CT   | 177968251 |
| rs4976761 | COL23A1   | AC   | 177766183 |
| rs4976765 | COL23A1   | AG   | 177789202 |
| rs4976783 | COL23A1   | AG   | 177901202 |
| rs4976788 | COL23A1   | CT   | 177960432 |
| rs4976790 | COL23A1   | GT   | 177968915 |
| rs4982695 | MMP14     | CT   | 23322613  |
| rs4982697 | MMP14     | AG   | 23326242  |
| rs4999923 | TIMP3     | CT   | 33251408  |
| rs5012370 | MATN2     | CT   | 98938231  |
| rs5024595 | ADAM12    | CT   | 127856798 |
| rs5025055 | TGFBR3    | CT   | 92141816  |
| rs5749524 | TIMP3     | CT   | 33224285  |
| rs5754289 | TIMP3     | CT   | 33192544  |
| rs5764781 | FBLN1     | AG   | 45943677  |
| rs5764804 | FBLN1     | CT   | 45990039  |
| rs5765425 | FBLN1     | AG   | 45892433  |

|           |         |    |           |
|-----------|---------|----|-----------|
| rs5765475 | FBLN1   | CT | 45959337  |
| rs5765512 | FBLN1   | CT | 45983415  |
| rs5929098 | COL4A5  | CT | 107692305 |
| rs5929100 | COL4A5  | AG | 107711906 |
| rs5929126 | COL4A5  | AC | 107690996 |
| rs5973878 | COL4A5  | GT | 107715484 |
| rs5987017 | BGN     | AG | 152782172 |
| rs6007085 | FBLN1   | GT | 45936527  |
| rs6007088 | FBLN1   | AG | 45949291  |
| rs6104416 | MMP9    | AC | 44628514  |
| rs6130803 | MATN4   | AG | 43923102  |
| rs6422346 | COL23A1 | AG | 177678526 |
| rs6422347 | COL23A1 | CT | 177863083 |
| rs6424883 | LAMC1   | CT | 183037695 |
| rs6427128 | ADAM15  | AC | 155026942 |
| rs6429452 | NID1    | CT | 236155219 |
| rs6429466 | NID1    | CT | 236190813 |
| rs6432017 | ADAM17  | AG | 9693875   |
| rs6434304 | COL3A1  | CT | 189833911 |
| rs6434309 | COL3A1  | AC | 189883166 |
| rs6434317 | COL5A2  | GT | 189936687 |
| rs6436661 | COL4A3  | CT | 228056670 |
| rs6436664 | COL4A3  | CT | 228084164 |
| rs6436666 | COL4A3  | AG | 228092697 |
| rs6436669 | COL4A3  | AG | 228113175 |
| rs6436670 | COL4A3  | CT | 228126494 |
| rs6437343 | GPC1    | AG | 241367465 |
| rs6438087 | CCDC80  | AG | 112366816 |
| rs6442396 | FBLN2   | AG | 13586461  |
| rs6453815 | COL12A1 | AG | 75835305  |
| rs6464929 | PDIA4   | AG | 148717467 |
| rs6464930 | PDIA4   | CT | 148720906 |
| rs6465412 | COL1A2  | CT | 94058395  |
| rs6468601 | MATN2   | CT | 98877537  |
| rs6469915 | COL14A1 | AG | 121325670 |
| rs6469916 | COL14A1 | AG | 121332791 |
| rs6478963 | COL15A1 | CT | 101708150 |
| rs6478966 | COL15A1 | AG | 101776125 |
| rs6480654 | P4HA1   | AC | 74773230  |
| rs6481819 | ITGB1   | CT | 33299459  |
| rs6486166 | SPON1   | CT | 14105497  |
| rs6486169 | SPON1   | CT | 14155002  |
| rs6486178 | SPON1   | CT | 14206679  |
| rs6486182 | SPON1   | AG | 14233522  |
| rs6492246 | COL4A1  | CT | 110869422 |
| rs6492252 | COL4A1  | AG | 110922694 |
| rs6492270 | COL4A2  | AG | 111072732 |
| rs6492279 | COL4A2  | CT | 111165390 |

|           |           |    |           |
|-----------|-----------|----|-----------|
| rs6493327 | FBN1      | AG | 48809428  |
| rs6501266 | TIMP2     | CT | 76907353  |
| rs6520278 | TIMP1     | CT | 47447924  |
| rs6520279 | TIMP1     | CT | 47448096  |
| rs6536939 | TLL1      | AG | 166889110 |
| rs6536942 | TLL1      | AG | 166986194 |
| rs6537935 | COL5A1    | CT | 137524648 |
| rs6537941 | COL5A1    | AC | 137559417 |
| rs6537949 | COL5A1    | GT | 137673861 |
| rs6563562 | POSTN     | CT | 38158718  |
| rs6569585 | LAMA2     | CT | 129474946 |
| rs6569603 | LAMA2     | AC | 129793717 |
| rs6572807 | NID2      | AG | 52480621  |
| rs6572813 | NID2      | CT | 52539090  |
| rs6575439 | SERPINA12 | CT | 94980807  |
| rs6579891 | SPARC     | CT | 151074609 |
| rs6580647 | COL2A1    | AC | 48403229  |
| rs6584079 | TLL2      | CT | 98252496  |
| rs6584080 | TLL2      | CT | 98255951  |
| rs6597740 | ADAM12    | CT | 127852721 |
| rs6597743 | ADAM12    | CT | 127879856 |
| rs6597745 | ADAM12    | CT | 127895098 |
| rs6597750 | ADAM12    | AC | 127943038 |
| rs6597753 | ADAM12    | CT | 127948079 |
| rs6597754 | ADAM12    | CT | 127948238 |
| rs6605524 | THBS2     | AG | 169656120 |
| rs6651180 | MATN2     | CT | 99018395  |
| rs6660484 | TGFBR3    | AG | 92172608  |
| rs6665312 | TGFBR3    | CT | 92180903  |
| rs6667609 | COL11A1   | GT | 103499049 |
| rs6667611 | TNN       | CT | 175033141 |
| rs6677523 | TGFBR3    | AG | 92202467  |
| rs6680614 | TGFBR3    | GT | 92358371  |
| rs6682554 | PLOD1     | CT | 11986621  |
| rs6683840 | TGFBR3    | AG | 92249817  |
| rs6690340 | LAMC1     | AG | 183116686 |
| rs6691075 | COL11A1   | AG | 103416690 |
| rs6693438 | TGFBR3    | AG | 92163174  |
| rs6696455 | TNN       | CT | 175087729 |
| rs6697630 | FMOD      | AG | 203319816 |
| rs6697996 | PLOD1     | GT | 12006802  |
| rs6701037 | TNN       | AC | 175120079 |
| rs6703740 | TNN       | GT | 175041977 |
| rs6704864 | COL4A3    | AG | 228051314 |
| rs6705408 | ADAM17    | CT | 9630231   |
| rs6707530 | FN1       | GT | 216240584 |
| rs6718820 | COL4A3    | AC | 228038804 |
| rs6722825 | COL4A3    | AG | 228039866 |

|           |         |    |           |
|-----------|---------|----|-----------|
| rs6723547 | COL4A3  | CT | 228098122 |
| rs6726181 | EFEMP1  | CT | 56087766  |
| rs6727477 | COL4A3  | CT | 228059671 |
| rs6728149 | COL4A3  | AG | 228092334 |
| rs6728818 | COL6A3  | AG | 238244963 |
| rs6729152 | COL4A3  | GT | 228144706 |
| rs6735744 | COL4A3  | CT | 228036202 |
| rs6737679 | COL4A3  | AG | 228059546 |
| rs6737889 | COL4A3  | AG | 228052220 |
| rs6739977 | COL4A3  | AG | 228065095 |
| rs6741369 | ITGAV   | GT | 187487269 |
| rs6744212 | COL6A3  | AG | 238224335 |
| rs6744921 | FN1     | AG | 216266736 |
| rs6756117 | COL4A3  | AG | 228069010 |
| rs6756834 | COL4A3  | CT | 228083236 |
| rs6756898 | COL4A3  | CT | 228092406 |
| rs6758526 | COL6A3  | AG | 238327751 |
| rs6759927 | COL6A3  | AG | 238227919 |
| rs6765409 | FBLN2   | CT | 13646247  |
| rs6768588 | ITGB5   | AG | 124487335 |
| rs6771896 | ITGB5   | AG | 124545750 |
| rs6774776 | CCDC80  | AG | 112345135 |
| rs6779394 | LAMB2   | AG | 49157771  |
| rs6787638 | ITGB5   | CT | 124582319 |
| rs6794305 | CCDC80  | CT | 112355977 |
| rs6801418 | PLOD2   | AC | 145833232 |
| rs6801891 | FBLN2   | CT | 13667818  |
| rs6803572 | FBLN2   | AG | 13650434  |
| rs6807798 | CCDC80  | GT | 112359926 |
| rs6811456 | TLL1    | CT | 166785679 |
| rs6817700 | NPNT    | AG | 106891531 |
| rs6839829 | SPARCL1 | CT | 88454048  |
| rs6843517 | NPNT    | AG | 106870409 |
| rs6855132 | NPNT    | AG | 106877631 |
| rs6860507 | ADAM19  | AG | 156898690 |
| rs6861486 | SPARC   | CT | 151049775 |
| rs6861887 | SPARC   | GT | 151050044 |
| rs6861956 | TGFBI   | CT | 135409014 |
| rs6867396 | VCAN    | AG | 82776301  |
| rs6875485 | ADAM19  | AC | 156966595 |
| rs6877684 | SPARC   | AC | 151033821 |
| rs6880837 | TGFBI   | CT | 135396669 |
| rs6892747 | COL23A1 | CT | 177715452 |
| rs6894906 | TGFBI   | AG | 135355038 |
| rs6899012 | TGFBI   | AG | 135403529 |
| rs6899205 | ADAM19  | AG | 156943285 |
| rs6899453 | LAMA4   | GT | 112500496 |
| rs6907109 | LAMA4   | CT | 112502989 |

|           |          |    |           |
|-----------|----------|----|-----------|
| rs6912145 | LAMA4    | AG | 112519743 |
| rs6913656 | LAMA4    | AG | 112483235 |
| rs6914003 | LAMA2    | CT | 129715822 |
| rs6917532 | LAMA2    | AG | 129788658 |
| rs6917644 | CTGF     | AG | 132265665 |
| rs6921064 | LAMA2    | AC | 129410662 |
| rs6926573 | LAMA4    | CT | 112564517 |
| rs6930262 | LAMA4    | AG | 112427825 |
| rs6934624 | LAMA2    | AG | 129413333 |
| rs6936981 | LAMA2    | CT | 129667270 |
| rs6939307 | LAMA2    | GT | 129838002 |
| rs6940420 | THBS2    | AG | 169631907 |
| rs6940801 | THBS2    | AG | 169655667 |
| rs6943225 | LAMB1    | CT | 107646766 |
| rs6950982 | SERPINE1 | AG | 100766603 |
| rs6958024 | ADAM22   | GT | 87695787  |
| rs6968026 | ADAM22   | AG | 87713925  |
| rs6979091 | LAMB1    | GT | 107651361 |
| rs6988293 | COL14A1  | AG | 121234298 |
| rs6989074 | COL14A1  | AG | 121234756 |
| rs6996243 | MATN2    | AG | 98871690  |
| rs7001798 | COL14A1  | AC | 121336915 |
| rs7004099 | COL14A1  | AC | 121325031 |
| rs7005932 | COL14A1  | AG | 121194900 |
| rs7013298 | COL14A1  | CT | 121087046 |
| rs7018223 | COL14A1  | AG | 121214976 |
| rs7031588 | COL15A1  | CT | 101822302 |
| rs7035322 | TNC      | AC | 117787173 |
| rs7044529 | COL5A1   | CT | 137568051 |
| rs7053892 | COL4A5   | AG | 107675049 |
| rs7062216 | BGN      | AG | 152769502 |
| rs7069895 | ADAM12   | AG | 127913896 |
| rs7070439 | TLL2     | AG | 98230489  |
| rs7070979 | TLL2     | CT | 98170594  |
| rs7072808 | ADAM12   | CT | 127964149 |
| rs7078184 | TLL2     | AG | 98250191  |
| rs7078304 | TLL2     | AG | 98183070  |
| rs7078493 | TLL2     | GT | 98204095  |
| rs7079180 | ADAM12   | CT | 127790305 |
| rs7080604 | ADAM12   | AG | 127764957 |
| rs7081193 | ADAM12   | CT | 128074225 |
| rs7082031 | ADAM12   | CT | 128038717 |
| rs7083245 | TLL2     | CT | 98221417  |
| rs7084288 | ADAM12   | AG | 128059654 |
| rs7089454 | ADAM12   | CT | 127904710 |
| rs7097346 | ADAM12   | AG | 128007683 |
| rs7097356 | ADAM12   | CT | 127911584 |
| rs7099756 | TLL2     | CT | 98252519  |

|           |           |    |           |
|-----------|-----------|----|-----------|
| rs7099772 | ADAM12    | CT | 127729222 |
| rs7103919 | SPON1     | CT | 14253351  |
| rs7104613 | SPON1     | CT | 14079931  |
| rs7109409 | SPON1     | AG | 14167577  |
| rs7119081 | SPON1     | AG | 14220811  |
| rs7119084 | MMP10     | AG | 102649235 |
| rs7124311 | SPON1     | GT | 14050389  |
| rs7125320 | MMP1      | GT | 102663708 |
| rs7139699 | COL4A2    | CT | 111005475 |
| rs7140030 | COL4A2    | AG | 111064159 |
| rs7143288 | FBLN5     | CT | 92337877  |
| rs7144352 | NID2      | CT | 52495375  |
| rs7152296 | SERPINA12 | AG | 94960384  |
| rs7158068 | SERPINA12 | CT | 94973644  |
| rs7161648 | SERPINA12 | CT | 94965464  |
| rs7164585 | FBN1      | CT | 48827144  |
| rs7165060 | FBN1      | CT | 48787194  |
| rs7169625 | FBN1      | CT | 48739652  |
| rs7169848 | FBN1      | CT | 48879360  |
| rs7173049 | LOXL1     | AG | 74244610  |
| rs7180356 | ACAN      | CT | 89371887  |
| rs7183203 | FBN1      | CT | 48870456  |
| rs7187242 | MMP2      | CT | 55499994  |
| rs7187536 | MMP2      | AG | 55491927  |
| rs7190378 | MMP2      | AG | 55469404  |
| rs7193268 | ITGAM     | CT | 31340997  |
| rs7197377 | MMP2      | AG | 55440604  |
| rs7199709 | MMP2      | CT | 55436813  |
| rs7212662 | TIMP2     | GT | 76918131  |
| rs7214592 | TIMP2     | AG | 76930769  |
| rs7218237 | TIMP2     | GT | 76871638  |
| rs7222639 | LGALS3BP  | CT | 76958759  |
| rs7226712 | EMILIN2   | CT | 2874552   |
| rs7250381 | CALR      | AG | 13050201  |
| rs7278425 | COL18A1   | CT | 46926551  |
| rs7280485 | COL6A2    | AG | 47548347  |
| rs7283829 | COL6A1    | AG | 47427839  |
| rs7284208 | FBLN1     | AG | 45950803  |
| rs7287772 | TIMP3     | CT | 33188307  |
| rs7305954 | COL2A1    | CT | 48403530  |
| rs7317390 | COL4A2    | CT | 110984977 |
| rs7317733 | COL4A2    | AC | 111146513 |
| rs7317784 | COL4A1    | CT | 110955074 |
| rs7317784 | COL4A2    | CT | 110955074 |
| rs7318486 | COL4A2    | AC | 111013203 |
| rs7319307 | COL4A1    | CT | 110793077 |
| rs7319311 | COL4A2    | AG | 111030578 |
| rs7322495 | COL4A2    | CT | 110991285 |

|           |         |    |           |
|-----------|---------|----|-----------|
| rs7323378 | POSTN   | CT | 38153351  |
| rs7326145 | COL4A2  | AC | 111047350 |
| rs7326449 | COL4A2  | AG | 111099122 |
| rs7327721 | COL4A2  | CT | 111174526 |
| rs7328731 | COL4A2  | AG | 111056994 |
| rs7330054 | COL4A2  | AG | 110986632 |
| rs7330851 | COL4A1  | AG | 110844188 |
| rs7334322 | COL4A2  | CT | 111150714 |
| rs7336547 | COL4A2  | CT | 110992985 |
| rs7342880 | TIMP2   | AC | 76874512  |
| rs7358800 | COL4A2  | AG | 111012857 |
| rs7373878 | ITGB5   | GT | 124610238 |
| rs7380466 | COL23A1 | AG | 177720154 |
| rs7419543 | COL5A2  | CT | 189967433 |
| rs7422977 | COL3A1  | GT | 189884587 |
| rs7445039 | COL23A1 | AG | 177795627 |
| rs7453910 | LAMA2   | CT | 129678863 |
| rs7483963 | SPON1   | AG | 14235676  |
| rs7501702 | MFAP4   | AG | 19293727  |
| rs7502935 | TIMP2   | AG | 76878629  |
| rs7513205 | ECM1    | AG | 150472781 |
| rs7514724 | TGFBR3  | CT | 92173847  |
| rs7517044 | TGFBR3  | AG | 92198162  |
| rs7536947 | TGFBR3  | CT | 92248695  |
| rs7537288 | COL11A1 | GT | 103576354 |
| rs7541061 | CHI3L1  | AC | 203163367 |
| rs7542028 | DPT     | CT | 168687822 |
| rs7542294 | CHI3L1  | AG | 203151176 |
| rs7543148 | FMOD    | CT | 203317162 |
| rs7543626 | COL11A1 | AG | 103578334 |
| rs7544130 | COL11A1 | AC | 103451455 |
| rs7544816 | COL11A1 | AC | 103556059 |
| rs7546260 | TNN     | GT | 175086965 |
| rs7550034 | TGFBR3  | AG | 92364576  |
| rs7555476 | TGFBR3  | CT | 92310666  |
| rs7555548 | TGFBR3  | GT | 92310690  |
| rs7559906 | EFEMP1  | CT | 56133040  |
| rs7561588 | ADAM17  | AG | 9619204   |
| rs7563085 | EFEMP1  | AG | 56103170  |
| rs7575234 | FN1     | CT | 216268902 |
| rs7576849 | GPC1    | AG | 241386352 |
| rs7577243 | GPC1    | AG | 241382083 |
| rs7577732 | COL4A3  | AG | 228098933 |
| rs7579903 | COL3A1  | AG | 189862097 |
| rs7586225 | COL6A3  | AC | 238255686 |
| rs7587228 | COL4A3  | CT | 228177479 |
| rs7588661 | FN1     | CT | 216253454 |
| rs7589466 | EFEMP1  | AG | 56103352  |



|           |         |     |           |
|-----------|---------|-----|-----------|
| rs7596514 | COL3A1  | AG  | 189878769 |
| rs7597795 | COL6A3  | AG  | 238270726 |
| rs7604984 | FN1     | AG  | 216217639 |
| rs7606754 | COL4A3  | AG  | 228135180 |
| rs7606877 | GPC1    | AG  | 241410024 |
| rs7607614 | COL3A1  | CT  | 189841052 |
| rs7610284 | FBLN2   | CT  | 13680861  |
| rs7620601 | CCDC80  | CT  | 112371578 |
| rs7650893 | ITGB5   | CT  | 124533315 |
| rs7654070 | TLL1    | AG  | 166854660 |
| rs7659624 | SPON2   | CT  | 1179213   |
| rs7669159 | TLL1    | AG  | 166939490 |
| rs7669287 | SPON2   | AG  | 1159680   |
| rs7677557 | NPNT    | CT  | 106872861 |
| rs7679471 | TLL1    | CT  | 166854959 |
| rs7683311 | SPARCL1 | AC  | 88392755  |
| rs7691244 | NPNT    | AG  | 106901228 |
| rs7704172 | COL23A1 | CT  | 177727491 |
| rs7706759 | COL23A1 | AG  | 177893248 |
| rs7708757 | COL23A1 | CT  | 177777888 |
| rs7710491 | VCAN    | CT  | 82778462  |
| rs7713018 | COL23A1 | GT  | 177956908 |
| rs7713983 | COL23A1 | CT  | 177690978 |
| rs7714353 | ADAM19  | CT  | 156870534 |
| rs7715762 | COL23A1 | AG  | 177664297 |
| rs7716953 | COL23A1 | CT  | 177842788 |
| rs7718220 | COL23A1 | CT  | 177919951 |
| rs7719224 | ADAM19  | CT  | 156999340 |
| rs7719352 | COL23A1 | CT  | 177661902 |
| rs7719521 | SPARC   | AC  | 151049404 |
| rs7722612 | COL23A1 | CT  | 177826469 |
| rs7724199 | ADAM19  | AG  | 156989957 |
| rs7725069 | ADAM19  | CT  | 156989757 |
| rs7727323 | COL23A1 | AG  | 177780183 |
| rs7728076 | COL23A1 | CT  | 177857534 |
| rs7729589 | COL23A1 | CT  | 177787515 |
| rs7738951 | LAMA4   | AG  | 112518090 |
| rs7741996 | LAMA2   | CT  | 129796620 |
| rs7742931 | LAMA4   | ACG | 112463693 |
| rs7751685 | LAMA2   | AC  | 129422405 |
| rs7753862 | LAMA2   | CT  | 129646393 |
| rs7754167 | LAMA2   | AG  | 129823645 |
| rs7754329 | LAMA4   | CT  | 112526404 |
| rs7758152 | COL12A1 | CT  | 75815840  |
| rs7763896 | CTGF    | GT  | 132279804 |
| rs7764005 | THBS2   | CT  | 169607718 |
| rs7766236 | LAMA4   | AC  | 112485798 |
| rs7766548 | LAMA2   | AG  | 129525473 |

|           |         |    |           |
|-----------|---------|----|-----------|
| rs7766689 | LAMA2   | AG | 129643527 |
| rs7766787 | LAMA4   | AG | 112573780 |
| rs7770270 | LAMA2   | AG | 129707118 |
| rs7774197 | TNXB    | AC | 32046275  |
| rs7777930 | PLOD3   | CT | 100853231 |
| rs7788778 | LAMB1   | CT | 107601523 |
| rs7789846 | LAMB1   | CT | 107605412 |
| rs7792913 | ADAM22  | CT | 87812968  |
| rs7805430 | COL1A2  | AG | 94056216  |
| rs7810426 | ADAM22  | GT | 87826957  |
| rs7812993 | BMP1    | AG | 22025644  |
| rs7813088 | COL14A1 | AC | 121269836 |
| rs7813506 | COL14A1 | AG | 121270124 |
| rs7814222 | COL14A1 | AG | 121270355 |
| rs7814885 | BMP1    | CT | 22063131  |
| rs7815790 | MATN2   | AG | 98902730  |
| rs7819160 | COL14A1 | AG | 121329119 |
| rs7819541 | BMP1    | GT | 22042151  |
| rs7820004 | COL14A1 | CT | 121140963 |
| rs7827219 | COL14A1 | AG | 121130164 |
| rs7831897 | MATN2   | AG | 98900769  |
| rs7838961 | BMP1    | AG | 22038952  |
| rs7841621 | COL14A1 | CT | 121068248 |
| rs7843130 | COL14A1 | AG | 121120890 |
| rs7849193 | COL5A1  | AG | 137650824 |
| rs7849777 | COL5A1  | AG | 137672801 |
| rs7851787 | COL15A1 | CT | 101785633 |
| rs7855580 | COL5A1  | AG | 137661911 |
| rs7863250 | COL15A1 | CT | 101793834 |
| rs7864699 | COL5A1  | CT | 137724371 |
| rs7869742 | ECM2    | AG | 95256174  |
| rs7875140 | COL5A1  | CT | 137613772 |
| rs7896870 | ADAM12  | CT | 127827684 |
| rs7897850 | ADAM12  | GT | 127693203 |
| rs7900158 | ADAM12  | CT | 127718332 |
| rs7900442 | ITGB1   | AG | 33186544  |
| rs7901239 | ADAM12  | CT | 128073227 |
| rs7901456 | ADAM12  | AC | 127970386 |
| rs7908946 | ADAM12  | AG | 127913568 |
| rs7910333 | ADAM12  | CT | 128030262 |
| rs7911793 | ADAM12  | CT | 127731535 |
| rs7912236 | ADAM12  | CT | 127879242 |
| rs7915341 | TLL2    | GT | 98157460  |
| rs7919721 | TLL2    | AG | 98158494  |
| rs7920091 | ADAM12  | AG | 127722422 |
| rs7932425 | SPON1   | CT | 14242470  |
| rs7945189 | MMP1    | CT | 102660564 |
| rs7945189 | MMP10   | CT | 102660564 |

|           |           |    |           |
|-----------|-----------|----|-----------|
| rs7948160 | SPON1     | AG | 14261886  |
| rs7954702 | DCN       | CT | 91530866  |
| rs7971880 | COL2A1    | AG | 48391055  |
| rs7981946 | COL4A1    | CT | 110812242 |
| rs7987982 | COL4A1    | CT | 110931311 |
| rs7989565 | COL4A2    | AG | 110982357 |
| rs7991229 | COL4A2    | GT | 111091995 |
| rs7991436 | COL4A2    | AG | 111026440 |
| rs7994305 | COL4A1    | AC | 110868460 |
| rs7995158 | COL4A2    | AG | 111111717 |
| rs7995370 | COL4A2    | CT | 111118948 |
| rs7999790 | COL4A1    | GT | 110895995 |
| rs8004587 | SERPINA12 | AG | 94987996  |
| rs8008729 | SERPINA12 | CT | 94950121  |
| rs8014455 | NID2      | CT | 52461699  |
| rs8014548 | FBLN5     | CT | 92409103  |
| rs8024016 | ACAN      | GT | 89408081  |
| rs8028537 | ACAN      | AG | 89345947  |
| rs8031532 | ACAN      | GT | 89358329  |
| rs8031741 | ACAN      | AG | 89418869  |
| rs8036376 | THBS1     | AC | 39868627  |
| rs8040336 | PDIA3     | CT | 44053617  |
| rs8041685 | LOXL1     | AG | 74225193  |
| rs8048583 | ITGAM     | CT | 31279536  |
| rs8054459 | MMP2      | AG | 55544549  |
| rs8064954 | ADAM11    | AC | 42867443  |
| rs8066116 | TIMP2     | CT | 76929879  |
| rs8074370 | LGALS3BP  | CT | 76957331  |
| rs8080307 | TIMP2     | AG | 76858353  |
| rs8097282 | EMILIN2   | AG | 2878613   |
| rs8123253 | MATN4     | CT | 43912390  |
| rs8126757 | COL18A1   | AG | 46848282  |
| rs8130155 | ADAMTS1   | CT | 28226646  |
| rs8136803 | TIMP3     | GT | 33237112  |
| rs8138025 | FBLN1     | AG | 45974757  |
| rs8179334 | COL11A1   | AG | 103367095 |
| rs8192306 | BMP1      | AG | 22015853  |
| rs9283850 | THBS2     | AG | 169637456 |
| rs9285464 | LAMA2     | CT | 129314221 |
| rs9285465 | LAMA2     | CT | 129734216 |
| rs9288163 | COL5A2    | AG | 190013146 |
| rs9289713 | PLOD2     | CT | 145824025 |
| rs9293996 | COL12A1   | CT | 75826134  |
| rs9294977 | THBS2     | AG | 169624172 |
| rs9301432 | COL4A1    | AG | 110811451 |
| rs9301436 | COL4A1    | AG | 110873099 |
| rs9301445 | COL4A1    | CT | 110951487 |
| rs9301445 | COL4A2    | CT | 110951487 |

|           |         |     |           |
|-----------|---------|-----|-----------|
| rs9302667 | MMP2    | AC  | 55456835  |
| rs9302671 | MMP2    | GT  | 55521725  |
| rs9305294 | ADAMTS1 | CT  | 28225582  |
| rs9306126 | COL18A1 | CT  | 46816363  |
| rs9313634 | ADAM19  | CT  | 156964594 |
| rs9315503 | POSTN   | AG  | 38139260  |
| rs9321159 | LAMA2   | CT  | 129630354 |
| rs9374311 | LAMA4   | CT  | 112524266 |
| rs9375609 | LAMA2   | CT  | 129346877 |
| rs9379341 | THBS2   | CT  | 169643685 |
| rs9388686 | LAMA2   | AC  | 129425564 |
| rs9388700 | LAMA2   | CT  | 129697797 |
| rs9398302 | LAMA4   | AG  | 112556666 |
| rs9398901 | LAMA2   | AG  | 129671311 |
| rs9399005 | CTGF    | CT  | 132268964 |
| rs9402089 | LAMA2   | CT  | 129275826 |
| rs9402090 | LAMA2   | CT  | 129313499 |
| rs9402098 | LAMA2   | AG  | 129371533 |
| rs9402130 | LAMA2   | AG  | 129748503 |
| rs9410002 | COL5A1  | AG  | 137730956 |
| rs9422812 | ADAM12  | GT  | 127834139 |
| rs9422969 | ADAM12  | AG  | 127997303 |
| rs9447453 | COL12A1 | AC  | 75878425  |
| rs9482954 | LAMA2   | GT  | 129235633 |
| rs9482965 | LAMA2   | AG  | 129283603 |
| rs9482982 | LAMA2   | GT  | 129405133 |
| rs9483012 | LAMA2   | AC  | 129678523 |
| rs9483364 | CTGF    | AG  | 132281798 |
| rs9487847 | LAMA4   | CT  | 112529268 |
| rs9487853 | LAMA4   | CT  | 112538321 |
| rs9487861 | LAMA4   | AC  | 112558498 |
| rs9492168 | LAMA2   | CT  | 129295840 |
| rs9492188 | LAMA2   | CT  | 129332591 |
| rs9492191 | LAMA2   | AG  | 129335259 |
| rs9492200 | LAMA2   | AG  | 129344515 |
| rs9492223 | LAMA2   | AG  | 129404742 |
| rs9492262 | LAMA2   | CT  | 129505832 |
| rs9492268 | LAMA2   | ACT | 129513448 |
| rs9492325 | LAMA2   | AG  | 129788465 |
| rs9505896 | THBS2   | AG  | 169646920 |
| rs9505933 | THBS2   | CT  | 169606443 |
| rs9515168 | COL4A1  | GT  | 110869433 |
| rs9515170 | COL4A1  | CT  | 110878775 |
| rs9515201 | COL4A2  | AC  | 111040798 |
| rs9521623 | COL4A1  | AC  | 110809382 |
| rs9521642 | COL4A1  | AG  | 110845060 |
| rs9521650 | COL4A1  | AG  | 110866265 |
| rs9521664 | COL4A1  | CT  | 110889902 |

|           |         |    |           |
|-----------|---------|----|-----------|
| rs9521666 | COL4A1  | AG | 110897444 |
| rs9521699 | COL4A2  | AG | 110984609 |
| rs9521725 | COL4A2  | AG | 111024974 |
| rs9521733 | COL4A2  | CT | 111034542 |
| rs9521748 | COL4A2  | AG | 111062680 |
| rs9521783 | COL4A2  | AG | 111111670 |
| rs9521789 | COL4A2  | CT | 111119620 |
| rs9521803 | COL4A2  | CT | 111132556 |
| rs9547947 | POSTN   | AC | 38131993  |
| rs9547952 | POSTN   | CT | 38138689  |
| rs9555680 | COL4A1  | CT | 110921814 |
| rs9555682 | COL4A1  | AG | 110941977 |
| rs9555690 | COL4A2  | CT | 111013190 |
| rs9555701 | COL4A2  | GT | 111103231 |
| rs9555714 | COL4A2  | AG | 111151959 |
| rs9559771 | COL4A2  | AG | 110985222 |
| rs9559792 | COL4A2  | CT | 111059093 |
| rs9559823 | COL4A2  | AG | 111143101 |
| rs9583467 | COL4A1  | AG | 110860861 |
| rs9583484 | COL4A1  | GT | 110966349 |
| rs9583484 | COL4A2  | GT | 110966349 |
| rs9588148 | COL4A2  | GT | 111021081 |
| rs9603226 | POSTN   | AG | 38143586  |
| rs9609643 | TIMP3   | AG | 33251059  |
| rs9619311 | TIMP3   | CT | 33196693  |
| rs9630453 | ACAN    | AG | 89403922  |
| rs9636786 | ADAMTS1 | CT | 28209494  |
| rs9637198 | COL18A1 | CT | 46820082  |
| rs9637646 | TLL1    | CT | 166803528 |
| rs9641021 | ADAM22  | CT | 87666666  |
| rs9641023 | ADAM22  | GT | 87759090  |
| rs9646148 | MMP14   | GT | 23300095  |
| rs9659030 | COL11A1 | CT | 103342392 |
| rs9661103 | TGFBR3  | CT | 92335906  |
| rs9704394 | SPON1   | AG | 13997399  |
| rs9717830 | THBS2   | CT | 169663638 |
| rs9765848 | THBS2   | CT | 169649827 |
| rs9792164 | MATN2   | AG | 98919139  |
| rs9806163 | FBN1    | CT | 48803839  |
| rs9820945 | PLOD2   | CT | 145818406 |
| rs9821338 | CCDC80  | CT | 112375450 |
| rs9822704 | FBLN2   | CT | 13603144  |
| rs9831797 | FBLN2   | CT | 13601079  |
| rs9835273 | FBLN2   | AG | 13653400  |
| rs9838270 | FBLN2   | CT | 13676940  |
| rs9843344 | FBLN2   | AG | 13670536  |
| rs9855853 | CCDC80  | AG | 112339751 |
| rs9863413 | FBLN2   | AG | 13651835  |

|            |         |    |           |
|------------|---------|----|-----------|
| rs9870432  | CCDC80  | AC | 112341941 |
| rs9874118  | ITGB5   | CT | 124516793 |
| rs9879289  | ITGB5   | AG | 124498173 |
| rs9880088  | LAMB2   | AG | 49178990  |
| rs9881100  | FBLN2   | AG | 13582768  |
| rs9888739  | ITGAM   | CT | 31313253  |
| rs9889410  | TIMP2   | AG | 76878980  |
| rs9894295  | TIMP2   | AG | 76862105  |
| rs9900972  | TIMP2   | AG | 76868614  |
| rs9917580  | FBLN1   | AG | 45907687  |
| rs9921970  | MMP2    | AG | 55445343  |
| rs9933802  | MMP2    | GT | 55429134  |
| rs9937837  | ITGAM   | GT | 31298939  |
| rs9950998  | EMILIN2 | CT | 2872368   |
| rs9968182  | ITGB5   | CT | 124601972 |
| rs9969584  | COL14A1 | AG | 121104786 |
| rs9970726  | NID1    | AC | 236132627 |
| rs9976834  | COL18A1 | CT | 46897214  |
| rs9977482  | COL18A1 | CT | 46899119  |
| rs9978018  | COL6A2  | AG | 47526240  |
| rs9980531  | COL18A1 | AG | 46859717  |
| rs9981981  | COL6A2  | AG | 47544838  |
| rs9982817  | COL6A2  | CT | 47514885  |
| rs9990589  | TLL1    | AG | 166830580 |
| rs9992768  | TLL1    | AG | 166901466 |
| rs9993980  | SPARCL1 | CT | 88424737  |
| rs10000995 | NPNT    | CT | 106839018 |
| rs10001608 | SPARCL1 | CT | 88437710  |
| rs10001634 | NPNT    | AG | 106895964 |
| rs10003271 | TLL1    | GT | 166945293 |
| rs10003497 | SPARCL1 | AG | 88429759  |
| rs10024099 | SPARCL1 | AG | 88389081  |
| rs10027979 | SPARCL1 | CT | 88456441  |
| rs10037451 | COL23A1 | CT | 177856605 |
| rs10039491 | COL23A1 | CT | 177891489 |
| rs10040971 | LOX     | CT | 121404787 |
| rs10046552 | COL1A2  | AC | 94057418  |
| rs10065788 | ADAM19  | CT | 156849535 |
| rs10067096 | ADAM19  | AC | 156917340 |
| rs10070303 | COL23A1 | CT | 177840382 |
| rs10087151 | COL14A1 | AG | 121172261 |
| rs10098159 | MATN2   | AG | 99009191  |
| rs10099863 | MATN2   | AC | 98874693  |
| rs10104973 | COL14A1 | AG | 121104385 |
| rs10110722 | COL14A1 | AG | 121178112 |
| rs10111291 | COL14A1 | AG | 121266654 |
| rs10117421 | TNC     | AC | 117778369 |
| rs10118040 | TNC     | AG | 117879414 |

|            |           |    |           |
|------------|-----------|----|-----------|
| rs10120210 | ECM2      | GT | 95284982  |
| rs10125663 | TNC       | CT | 117886416 |
| rs10128229 | ADAM12    | AG | 127982362 |
| rs10137158 | NID2      | CT | 52509858  |
| rs10140797 | SERPINA12 | AC | 94965685  |
| rs10142528 | FBLN5     | CT | 92330790  |
| rs10145558 | SERPINA12 | AG | 94971978  |
| rs10146057 | NID2      | AG | 52480752  |
| rs10146335 | FBLN5     | AG | 92423309  |
| rs10149012 | FBLN5     | CT | 92332816  |
| rs10153222 | MMP2      | GT | 55436751  |
| rs10161783 | COL4A2    | CT | 111009055 |
| rs10164812 | COL4A3    | CT | 228090011 |
| rs10167850 | COL6A3    | AC | 238271284 |
| rs10178458 | COL4A3    | CT | 228111435 |
| rs10178599 | COL6A3    | AG | 238264223 |
| rs10179642 | ADAM17    | CT | 9683696   |
| rs10187805 | COL4A3    | AG | 228100150 |
| rs10194682 | COL5A2    | AG | 189906743 |
| rs10197595 | PDIA6     | AG | 10956867  |
| rs10197695 | PDIA6     | AG | 10926910  |
| rs10198349 | COL4A3    | CT | 228061398 |
| rs10200215 | COL5A2    | CT | 189904674 |
| rs10202434 | COL6A3    | GT | 238251035 |
| rs10202483 | FN1       | AG | 216297875 |
| rs10207952 | COL4A3    | AG | 228063979 |
| rs10220027 | COL4A2    | CT | 111173659 |
| rs10229305 | LAMB1     | CT | 107638236 |
| rs10229877 | ADAM22    | AG | 87750115  |
| rs10235102 | COL1A2    | AC | 94051795  |
| rs10238083 | ADAM22    | AG | 87721928  |
| rs10239100 | ADAM22    | AC | 87564277  |
| rs10268574 | ADAM22    | GT | 87768174  |
| rs10279744 | ADAM22    | AG | 87670741  |
| rs10282572 | ADAM22    | CT | 87674671  |
| rs10399805 | CHI3L1    | AG | 203155998 |
| rs10406152 | COL5A3    | CT | 10071063  |
| rs10412065 | COL5A3    | CT | 10093028  |
| rs10447440 | LAMA2     | AC | 129554948 |
| rs10451555 | COL4A3    | AG | 228167560 |
| rs10452633 | LAMA4     | CT | 112442767 |
| rs10458655 | P4HA1     | AG | 74809596  |
| rs10461161 | SPARCL1   | AC | 88404126  |
| rs10463021 | ADAM19    | CT | 156869405 |
| rs10464068 | COL23A1   | AG | 177711520 |
| rs10464069 | COL23A1   | AG | 177790952 |
| rs10469935 | EFEMP1    | AC | 56154316  |
| rs10470990 | NPNT      | CT | 106821578 |

|            |         |    |           |
|------------|---------|----|-----------|
| rs10476093 | ADAM19  | AC | 157007001 |
| rs10479623 | COL23A1 | GT | 177768048 |
| rs10482979 | ADAMTS5 | CT | 28316282  |
| rs10487008 | ADAM22  | CT | 87781111  |
| rs10487009 | ADAM22  | AG | 87783166  |
| rs10487254 | COL1A2  | AC | 94046199  |
| rs10489328 | TNN     | GT | 175113118 |
| rs10489358 | DPT     | CT | 168654873 |
| rs10489359 | DPT     | AG | 168658544 |
| rs10489360 | DPT     | AG | 168667989 |
| rs10491806 | ECM2    | AG | 95284212  |
| rs10492497 | COL4A1  | CT | 110831866 |
| rs10492498 | COL4A1  | CT | 110850523 |
| rs10493856 | TGFBR3  | CT | 92334749  |
| rs10493859 | TGFBR3  | AC | 92273644  |
| rs10493860 | TGFBR3  | CT | 92212703  |
| rs10493986 | COL11A1 | CT | 103570127 |
| rs10493988 | COL11A1 | AG | 103566156 |
| rs10494553 | LAMC1   | AG | 183115952 |
| rs10494584 | PRG4    | CT | 186290521 |
| rs10494841 | FMOD    | CT | 203328740 |
| rs10495562 | ADAM17  | CT | 9631340   |
| rs10497699 | COL5A2  | CT | 190032578 |
| rs10498214 | COL4A3  | AG | 228064180 |
| rs10498215 | COL4A3  | CT | 228062729 |
| rs10498441 | NID2    | AG | 52544224  |
| rs10499146 | LAMA2   | AG | 129330021 |
| rs10499156 | LAMA2   | AG | 129688123 |
| rs10499159 | LAMA2   | AC | 129781192 |
| rs10500789 | SPON1   | GT | 14031713  |
| rs10510150 | ADAM12  | AC | 127788934 |
| rs10511316 | CCDC80  | AG | 112347079 |
| rs10514259 | VCAN    | AG | 82879340  |
| rs10514815 | ECM2    | AC | 95256695  |
| rs10517873 | TLL1    | AG | 166850443 |
| rs10519177 | FBN1    | AG | 48757195  |
| rs10519692 | LOX     | CT | 121395749 |
| rs10519694 | LOX     | CT | 121407219 |
| rs10520136 | THBS1   | AG | 39864909  |
| rs10521323 | MMP2    | AG | 55481221  |
| rs10521518 | COL4A5  | AG | 107734573 |
| rs10736104 | TLL2    | CT | 98122334  |
| rs10741636 | SPON1   | CT | 14169984  |
| rs10745384 | COL5A1  | CT | 137662523 |
| rs10748672 | TLL2    | CT | 98117061  |
| rs10751548 | ADAM12  | AG | 128053597 |
| rs10752893 | LAMC1   | CT | 183046261 |
| rs10752897 | LAMC1   | CT | 183071024 |



|            |         |    |           |
|------------|---------|----|-----------|
| rs10753939 | FMOD    | CT | 203318731 |
| rs10754833 | NID1    | CT | 236184931 |
| rs10763902 | ITGB1   | CT | 33218076  |
| rs10766169 | SPON1   | CT | 14225465  |
| rs10766177 | SPON1   | CT | 14255818  |
| rs10776897 | COL5A1  | AG | 137578978 |
| rs10783003 | TGFBR3  | CT | 92195746  |
| rs10791595 | MMP10   | CT | 102635501 |
| rs10794073 | ADAM12  | AC | 127945261 |
| rs10794075 | ADAM12  | CT | 127951826 |
| rs10794077 | ADAM12  | AG | 127971058 |
| rs10794080 | ADAM12  | CT | 128053754 |
| rs10794081 | ADAM12  | AC | 128079595 |
| rs10794082 | ADAM12  | CT | 128085765 |
| rs10798331 | TNN     | AG | 175034437 |
| rs10800913 | FMOD    | AG | 203315893 |
| rs10803234 | NID1    | AG | 236189961 |
| rs10808506 | COL14A1 | AG | 121066470 |
| rs10808507 | COL14A1 | AG | 121166429 |
| rs10817700 | TNC     | AG | 117775803 |
| rs10819542 | COL15A1 | AG | 101738188 |
| rs10827164 | ITGB1   | CT | 33232628  |
| rs10827167 | ITGB1   | CT | 33277782  |
| rs10832160 | SPON1   | AG | 14039840  |
| rs10832164 | SPON1   | CT | 14048480  |
| rs10832223 | SPON1   | CT | 14185693  |
| rs10832235 | SPON1   | AG | 14244240  |
| rs10851243 | COL4A2  | AC | 111067499 |
| rs10856792 | MATN3   | AG | 20208412  |
| rs10858265 | COL5A1  | CT | 137543874 |
| rs10859110 | LUM     | AG | 91504845  |
| rs10865714 | FBLN2   | AG | 13600524  |
| rs10874976 | TGFBR3  | AG | 92267272  |
| rs10874980 | TGFBR3  | AG | 92283899  |
| rs10882807 | TLL2    | CT | 98268119  |
| rs10901530 | ADAM12  | AC | 127760446 |
| rs10901534 | ADAM12  | AG | 127830613 |
| rs10901549 | ADAM12  | CT | 127862926 |
| rs10901552 | ADAM12  | CT | 127868383 |
| rs10901559 | ADAM12  | CT | 127898686 |
| rs10901580 | ADAM12  | CT | 127962222 |
| rs10901587 | ADAM12  | CT | 128001759 |
| rs10901589 | ADAM12  | CT | 128005524 |
| rs10901590 | ADAM12  | CT | 128008557 |
| rs10901596 | ADAM12  | AG | 128021575 |
| rs10901597 | ADAM12  | CT | 128025384 |
| rs10901601 | ADAM12  | CT | 128045741 |
| rs10901606 | ADAM12  | CT | 128075882 |

|            |          |    |           |
|------------|----------|----|-----------|
| rs10903227 | COL23A1  | CT | 177988888 |
| rs10908826 | ADAMTS4  | CT | 161172525 |
| rs10911203 | LAMC1    | AG | 183004076 |
| rs10911215 | LAMC1    | CT | 183029613 |
| rs10911233 | LAMC1    | AG | 183052585 |
| rs10912899 | TNN      | AG | 175120715 |
| rs10918959 | DPT      | GT | 168667162 |
| rs10920579 | CHI3L1   | AG | 203158972 |
| rs10920616 | FMOD     | AG | 203318227 |
| rs10929225 | COL6A3   | AG | 238227776 |
| rs10933170 | COL4A3   | GT | 228078194 |
| rs10933172 | COL4A3   | GT | 228121147 |
| rs10933175 | COL4A3   | AG | 228133512 |
| rs10945405 | THBS2    | CT | 169621136 |
| rs10949834 | ELN      | AG | 73480569  |
| rs10952902 | ADAM22   | AG | 87573611  |
| rs10952914 | ADAM22   | CT | 87759483  |
| rs10953329 | PLOD3    | CT | 100865847 |
| rs10955146 | MATN2    | AG | 99017548  |
| rs10982516 | TNC      | AG | 117845611 |
| rs10982521 | TNC      | CT | 117853103 |
| rs10982536 | TNC      | GT | 117869417 |
| rs10982549 | TNC      | AC | 117889530 |
| rs10988495 | COL15A1  | AG | 101755900 |
| rs11009157 | ITGB1    | AG | 33242401  |
| rs11023034 | SPON1    | AG | 13976643  |
| rs11023045 | SPON1    | CT | 14015660  |
| rs11023052 | SPON1    | CT | 14042019  |
| rs11023151 | SPON1    | AG | 14246099  |
| rs11069830 | COL4A1   | AC | 110821132 |
| rs11071829 | CILP     | CT | 65493667  |
| rs11071830 | CILP     | GT | 65510624  |
| rs11073813 | ACAN     | AG | 89357446  |
| rs11077405 | LGALS3BP | CT | 76969882  |
| rs11080994 | EMILIN2  | CT | 2897993   |
| rs11080995 | EMILIN2  | CT | 2900028   |
| rs11100626 | TLL1     | AG | 166827464 |
| rs11103451 | COL5A1   | CT | 137529221 |
| rs11103479 | COL5A1   | CT | 137610423 |
| rs11103509 | COL5A1   | CT | 137654103 |
| rs11103534 | COL5A1   | GT | 137700749 |
| rs11103544 | COL5A1   | CT | 137735043 |
| rs11103545 | COL5A1   | GT | 137739980 |
| rs11105995 | LUM      | GT | 91503261  |
| rs11106030 | DCN      | AC | 91575154  |
| rs11130199 | DAG1     | CT | 49538799  |
| rs11134766 | ADAM19   | CT | 156908317 |
| rs11150610 | ITGAM    | AC | 31334236  |

|            |          |     |           |
|------------|----------|-----|-----------|
| rs11153342 | LAMA4    | CT  | 112445106 |
| rs11153346 | LAMA4    | CT  | 112534163 |
| rs11153350 | LAMA4    | AG  | 112578384 |
| rs11154461 | LAMA2    | GT  | 129368803 |
| rs11154474 | LAMA2    | AG  | 129732674 |
| rs11157873 | NID2     | AC  | 52525611  |
| rs11157874 | NID2     | CT  | 52541543  |
| rs11164624 | COL11A1  | CT  | 103336601 |
| rs11164647 | COL11A1  | CT  | 103432687 |
| rs11164658 | COL11A1  | GT  | 103499896 |
| rs11164663 | COL11A1  | AC  | 103548497 |
| rs11164665 | COL11A1  | AG  | 103551918 |
| rs11164670 | COL11A1  | CT  | 103564540 |
| rs11165262 | TGFBR3   | CT  | 92153974  |
| rs11165354 | TGFBR3   | AC  | 92194322  |
| rs11165489 | TGFBR3   | AG  | 92248274  |
| rs11165594 | TGFBR3   | GT  | 92302369  |
| rs11168337 | COL2A1   | AC  | 48376530  |
| rs11168338 | COL2A1   | AC  | 48376969  |
| rs11168353 | COL2A1   | CGT | 48408212  |
| rs11188736 | TLL2     | AG  | 98118257  |
| rs11188741 | TLL2     | AG  | 98148857  |
| rs11188748 | TLL2     | GT  | 98166356  |
| rs11188749 | TLL2     | AG  | 98173991  |
| rs11188751 | TLL2     | AG  | 98175291  |
| rs11188758 | TLL2     | AG  | 98206115  |
| rs11188775 | TLL2     | AG  | 98226956  |
| rs11188795 | TLL2     | AG  | 98254309  |
| rs11188796 | TLL2     | CT  | 98254356  |
| rs11188799 | TLL2     | CT  | 98260206  |
| rs11236458 | SERPINH1 | CT  | 75278666  |
| rs11244772 | ADAM12   | AG  | 127711296 |
| rs11244776 | ADAM12   | AC  | 127719180 |
| rs11244777 | ADAM12   | AG  | 127719213 |
| rs11244795 | ADAM12   | AG  | 127754286 |
| rs11244796 | ADAM12   | CT  | 127756280 |
| rs11244813 | ADAM12   | AG  | 127794080 |
| rs11244841 | ADAM12   | CT  | 127834566 |
| rs11244843 | ADAM12   | AG  | 127836991 |
| rs11244849 | ADAM12   | GT  | 127845432 |
| rs11244857 | ADAM12   | AG  | 127851943 |
| rs11244887 | ADAM12   | GT  | 127902527 |
| rs11244909 | ADAM12   | CT  | 127944593 |
| rs11244911 | ADAM12   | AG  | 127946858 |
| rs11244923 | ADAM12   | CT  | 127953451 |
| rs11244924 | ADAM12   | AC  | 127955793 |
| rs11244948 | ADAM12   | CT  | 127998826 |
| rs11244955 | ADAM12   | AG  | 128005914 |

|            |           |    |           |
|------------|-----------|----|-----------|
| rs11244965 | ADAM12    | AG | 128037247 |
| rs11244969 | ADAM12    | AC | 128068527 |
| rs11244973 | ADAM12    | CT | 128070801 |
| rs11244975 | ADAM12    | AG | 128075119 |
| rs11247975 | SPON2     | GT | 1165130   |
| rs11249547 | COL23A1   | GT | 177918571 |
| rs11264300 | ADAM15    | AC | 155019710 |
| rs11264305 | ADAM15    | AG | 155033572 |
| rs11264306 | ADAM15    | AC | 155043325 |
| rs11465283 | ADAM19    | CT | 156958127 |
| rs11466561 | TGFBR3    | CT | 92314842  |
| rs11466782 | ADAM19    | AG | 156921955 |
| rs11547635 | TIMP3     | CT | 33253292  |
| rs11559201 | MATN2     | CT | 99006748  |
| rs11576557 | TGFBR3    | CT | 92323809  |
| rs11590043 | DPT       | AC | 168692615 |
| rs11590845 | NID1      | AC | 236170665 |
| rs11591508 | ITGB1     | CT | 33284653  |
| rs11597420 | TLL2      | AG | 98151328  |
| rs11603589 | SPON1     | AG | 14217874  |
| rs11606345 | SPON1     | CT | 14218697  |
| rs11626701 | SERPINA12 | AG | 94954368  |
| rs11630178 | ACAN      | CT | 89373839  |
| rs11632435 | ACAN      | AG | 89347327  |
| rs11633371 | ACAN      | GT | 89356832  |
| rs11635140 | FBN1      | CT | 48782563  |
| rs11637353 | CSPG4     | GT | 76014429  |
| rs11640811 | MMP2      | CT | 55442880  |
| rs11643163 | MMP2      | AG | 55498659  |
| rs11643666 | MMP2      | AG | 55490089  |
| rs11646699 | MMP2      | AG | 55464722  |
| rs11674048 | COL6A3    | CT | 238223858 |
| rs11677456 | COL6A3    | CT | 238265531 |
| rs11681705 | MATN3     | AG | 20202811  |
| rs11690358 | COL6A3    | CT | 238244781 |
| rs11694554 | COL4A3    | CT | 228085517 |
| rs11695502 | EFEMP1    | CT | 56094999  |
| rs11702367 | ITGB2     | AG | 46335761  |
| rs11702425 | COL18A1   | CT | 46908355  |
| rs11702782 | COL18A1   | AG | 46848589  |
| rs11704261 | TIMP3     | GT | 33206863  |
| rs11712980 | FBLN2     | AG | 13600056  |
| rs11730681 | NPNT      | AG | 106922960 |
| rs11738131 | COL23A1   | AC | 177655194 |
| rs11740086 | COL23A1   | CT | 177755543 |
| rs11742401 | ADAM19    | CT | 156953340 |
| rs11744096 | COL23A1   | CT | 177707274 |
| rs11745387 | SPARC     | AG | 151059231 |

|            |          |      |           |
|------------|----------|------|-----------|
| rs11745722 | COL23A1  | AG   | 177746863 |
| rs11746584 | COL23A1  | CT   | 177667642 |
| rs11746606 | ADAM19   | CT   | 156962499 |
| rs11746864 | COL23A1  | AG   | 177838868 |
| rs11747938 | SPARC    | CT   | 151037329 |
| rs11749965 | ADAM19   | CT   | 156997414 |
| rs11750135 | ADAM19   | CT   | 156957113 |
| rs11750519 | ADAM19   | CT   | 156872416 |
| rs11756439 | THBS2    | ACGT | 169648030 |
| rs11758161 | THBS2    | CT   | 169651344 |
| rs11764718 | COL1A2   | AG   | 94059317  |
| rs11766345 | LAMB1    | GT   | 107611650 |
| rs11768465 | PCOLCE   | CT   | 100198386 |
| rs11775186 | BMP1     | GT   | 22058122  |
| rs11777932 | BMP1     | AC   | 22033435  |
| rs11779647 | MATN2    | AC   | 98987643  |
| rs11782639 | COL14A1  | AG   | 121369431 |
| rs11784449 | MATN2    | GT   | 99015018  |
| rs11785807 | MATN2    | CT   | 99011698  |
| rs11787664 | TNC      | CT   | 117781656 |
| rs11789200 | TNC      | AG   | 117812791 |
| rs11802668 | PLOD1    | CT   | 12000670  |
| rs11804204 | DPT      | AG   | 168695047 |
| rs11809524 | COL11A1  | CT   | 103459537 |
| rs11813508 | ADAM12   | CT   | 127742994 |
| rs11817398 | P4HA1    | AG   | 74759871  |
| rs11847418 | NID2     | AG   | 52490630  |
| rs11853604 | ACAN     | GT   | 89388335  |
| rs11856834 | CILP     | CT   | 65496287  |
| rs11859163 | MMP2     | GT   | 55502376  |
| rs11861251 | ITGAM    | CT   | 31289396  |
| rs11871320 | LGALS3BP | CT   | 76964531  |
| rs11871490 | MFAP4    | CT   | 19296893  |
| rs11884740 | COL4A3   | AG   | 228093667 |
| rs11884770 | COL4A3   | CT   | 228086920 |
| rs11891192 | ITGAV    | GT   | 187546583 |
| rs11891922 | ADAM17   | AG   | 9649966   |
| rs11896721 | COL6A3   | AG   | 238284107 |
| rs11900265 | ADAM17   | CT   | 9680013   |
| rs11902058 | COL3A1   | AC   | 189862808 |
| rs11909037 | ADAMTS1  | CT   | 28226552  |
| rs11923433 | PLOD2    | AG   | 145886725 |
| rs11924163 | TIMP4    | AG   | 12210153  |
| rs11925421 | PLOD2    | AG   | 145888162 |
| rs11928651 | ITGB5    | CT   | 124577555 |
| rs11933466 | NPNT     | AG   | 106812732 |
| rs11951889 | ADAM19   | CT   | 156876784 |
| rs11956401 | COL23A1  | AG   | 177848109 |

|            |           |    |           |
|------------|-----------|----|-----------|
| rs11958296 | COL23A1   | AG | 177755179 |
| rs11963652 | LAMA2     | AG | 129551015 |
| rs11966235 | THBS2     | CT | 169626830 |
| rs11988416 | COL14A1   | AG | 121333937 |
| rs11996075 | MATN2     | CT | 98910287  |
| rs11998946 | COL5A1    | CT | 137679703 |
| rs12001981 | COL15A1   | AG | 101820545 |
| rs12019361 | ADAM22    | AG | 87573647  |
| rs12023499 | ADAM15    | CT | 155031376 |
| rs12027195 | NID1      | GT | 236187011 |
| rs12046389 | COL11A1   | AC | 103409100 |
| rs12050562 | FBN1      | CT | 48701228  |
| rs12052967 | COL6A3    | AG | 238299189 |
| rs12073224 | TGFBR3    | CT | 92200963  |
| rs12076549 | TGFBR3    | AC | 92201699  |
| rs12077300 | FMOD      | CT | 203317708 |
| rs12082710 | TGFBR3    | CT | 92155337  |
| rs12083818 | TNN       | CT | 175083952 |
| rs12094153 | TNN       | AG | 175094025 |
| rs12098279 | ADAM12    | AG | 127753985 |
| rs12101282 | FBLN5     | AG | 92342442  |
| rs12114940 | BMP1      | GT | 22048790  |
| rs12118365 | COL11A1   | CT | 103438795 |
| rs12121498 | COL11A1   | AG | 103380128 |
| rs12123436 | TGFBR3    | AG | 92215089  |
| rs12123883 | CHI3L1    | CT | 203164842 |
| rs12126497 | DPT       | GT | 168672858 |
| rs12128607 | PRG4      | CT | 186275564 |
| rs12131957 | COL11A1   | CT | 103467223 |
| rs12133988 | DPT       | CT | 168678324 |
| rs12134934 | PRG4      | CT | 186281400 |
| rs12138977 | COL11A1   | CT | 103393457 |
| rs12141988 | COL11A1   | AG | 103371544 |
| rs12142096 | COL11A1   | CT | 103362909 |
| rs12145872 | COL11A1   | CT | 103371652 |
| rs12146041 | TNN       | AG | 175102161 |
| rs12147719 | SERPINA12 | AG | 94979268  |
| rs12153855 | TNXB      | CT | 32074804  |
| rs12165359 | TIMP3     | CT | 33249271  |
| rs12184772 | COL4A1    | AG | 110847746 |
| rs12190465 | LAMA2     | AG | 129383680 |
| rs12190908 | LAMA4     | CT | 112527786 |
| rs12192613 | LAMA2     | CT | 129199783 |
| rs12192658 | LAMA4     | AG | 112504240 |
| rs12193446 | LAMA2     | AG | 129820038 |
| rs12195039 | LAMA4     | CT | 112580969 |
| rs12195178 | LAMA2     | CT | 129793012 |
| rs12195187 | LAMA2     | AG | 129519893 |

|            |           |    |           |
|------------|-----------|----|-----------|
| rs12198087 | LAMA4     | AG | 112534860 |
| rs12198173 | TNXB      | AG | 32026808  |
| rs12202008 | LAMA2     | CT | 129375673 |
| rs12203042 | LAMA2     | CT | 129817953 |
| rs12204892 | LAMA4     | CT | 112431283 |
| rs12205363 | LAMA2     | CT | 129834629 |
| rs12206487 | LAMA2     | CT | 129619410 |
| rs12208401 | LAMA2     | CT | 129620506 |
| rs12213754 | LAMA2     | AG | 129439995 |
| rs12215389 | COL12A1   | AG | 75889208  |
| rs12215657 | LAMA2     | CT | 129684068 |
| rs12215704 | LAMA2     | CT | 129519697 |
| rs12216916 | COL15A1   | CT | 101813506 |
| rs12228854 | COL2A1    | GT | 48396920  |
| rs12235159 | TNC       | CT | 117841938 |
| rs12243508 | ADAM12    | AG | 127997728 |
| rs12251014 | ADAM12    | CT | 127958529 |
| rs12264492 | ADAM12    | AG | 127854246 |
| rs12271585 | SPON1     | GT | 14006425  |
| rs12272341 | MMP10     | AG | 102644601 |
| rs12277421 | SERPINH1  | AG | 75267648  |
| rs12283632 | SPON1     | AG | 14058278  |
| rs12290253 | MMP10     | CT | 102642261 |
| rs12300271 | COL2A1    | CT | 48374616  |
| rs12332199 | VCAN      | CT | 82786194  |
| rs12333245 | TNXB      | AG | 32019769  |
| rs12352939 | COL15A1   | CT | 101786106 |
| rs12354990 | ADAM12    | GT | 128037499 |
| rs12365614 | SPON1     | AC | 14093889  |
| rs12404952 | TGFBR3    | CT | 92215725  |
| rs12409606 | NID1      | CT | 236220574 |
| rs12411075 | NID1      | CT | 236182924 |
| rs12413925 | TLL2      | CT | 98208861  |
| rs12415694 | ADAM12    | CT | 128045927 |
| rs12416625 | ADAM12    | CT | 127890797 |
| rs12423250 | COL2A1    | CT | 48389245  |
| rs12433651 | SERPINA12 | AG | 94964789  |
| rs12434141 | SERPINA12 | AG | 94947318  |
| rs12437465 | LOXL1     | CT | 74243246  |
| rs12439075 | ACAN      | CT | 89355911  |
| rs12440667 | LOXL1     | CT | 74231439  |
| rs12442211 | LOXL1     | AG | 74245675  |
| rs12454179 | EMILIN2   | AG | 2875255   |
| rs12463454 | PDIA6     | AG | 10958235  |
| rs12468719 | COL4A3    | AG | 228140460 |
| rs12470793 | COL4A3    | CT | 228046777 |
| rs12473402 | ADAM17    | AC | 9632718   |
| rs12476069 | COL6A3    | CT | 238321317 |

|            |         |    |           |
|------------|---------|----|-----------|
| rs12477499 | COL3A1  | AG | 189833034 |
| rs12478941 | MATN3   | GT | 20218658  |
| rs12483377 | COL18A1 | AG | 46931109  |
| rs12483553 | COL18A1 | AG | 46926093  |
| rs12487905 | ITGB5   | CT | 124521035 |
| rs12488326 | ITGB5   | AG | 124490088 |
| rs12513380 | TLL1    | AG | 166830364 |
| rs12519834 | COL23A1 | AG | 177802373 |
| rs12523864 | LAMA2   | CT | 129827116 |
| rs12526196 | CTGF    | CT | 132263476 |
| rs12532878 | PCOLCE  | AG | 100212254 |
| rs12541735 | COL14A1 | CT | 121183650 |
| rs12541737 | MATN2   | AC | 98972528  |
| rs12545308 | COL14A1 | CT | 121385167 |
| rs12551466 | COL5A1  | AG | 137737438 |
| rs12554098 | COL5A1  | AG | 137573609 |
| rs12563833 | TNN     | AG | 175109517 |
| rs12565776 | LAMC1   | AG | 183116531 |
| rs12569424 | TLL2    | CT | 98258871  |
| rs12571387 | ADAM12  | AG | 127769862 |
| rs12573768 | P4HA1   | AG | 74764074  |
| rs12574121 | SPON1   | CT | 14254796  |
| rs12586793 | FBLN5   | AG | 92401634  |
| rs12589592 | FBLN5   | AG | 92377802  |
| rs12620429 | ITGAV   | AC | 187489647 |
| rs12620653 | COL4A3  | CT | 228086059 |
| rs12622093 | COL6A3  | AG | 238283605 |
| rs12622722 | COL6A3  | AG | 238269120 |
| rs12626746 | COL6A2  | CT | 47548011  |
| rs12642840 | TLL1    | GT | 166955001 |
| rs12643464 | SPARCL1 | CT | 88438520  |
| rs12652833 | COL23A1 | CT | 177679728 |
| rs12653308 | VCAN    | AG | 82858828  |
| rs12658197 | VCAN    | AG | 82884488  |
| rs12660510 | LAMA2   | AG | 129666314 |
| rs12662729 | LAMA2   | CT | 129717442 |
| rs12664291 | LAMA2   | CT | 129471063 |
| rs12665286 | THBS2   | AG | 169609256 |
| rs12665573 | THBS2   | AG | 169625790 |
| rs12668754 | COL1A2  | AG | 94059236  |
| rs12669586 | ADAM22  | GT | 87666274  |
| rs12676720 | MATN2   | CT | 98927699  |
| rs12678374 | COL14A1 | AC | 121319783 |
| rs12683163 | TNC     | CT | 117815011 |
| rs12684637 | COL5A1  | CT | 137633543 |
| rs12686426 | COL5A1  | CT | 137642577 |
| rs12721420 | COL2A1  | CT | 48358794  |
| rs12721427 | COL2A1  | CT | 48368541  |



|            |         |    |           |
|------------|---------|----|-----------|
| rs12722864 | TGFBR3  | CT | 92191534  |
| rs12733054 | DPT     | CT | 168689602 |
| rs12739316 | LAMC1   | AG | 183052080 |
| rs12751148 | TGFBR3  | CT | 92190072  |
| rs12757745 | FMOD    | AG | 203308968 |
| rs12759840 | NID1    | AG | 236150576 |
| rs12762349 | ADAM12  | GT | 127825898 |
| rs12767127 | ADAM12  | AG | 127848780 |
| rs12769591 | P4HA1   | AG | 74808045  |
| rs12777779 | ADAM12  | CT | 127860067 |
| rs12778749 | ADAM12  | CT | 127846669 |
| rs12795982 | SPON1   | AG | 14114318  |
| rs12799462 | SPON1   | AC | 13977738  |
| rs12801550 | SPON1   | CT | 13993754  |
| rs12868126 | COL4A1  | AG | 110822524 |
| rs12868443 | COL4A2  | CT | 111066147 |
| rs12870273 | POSTN   | CT | 38173439  |
| rs12871092 | POSTN   | AG | 38159633  |
| rs12873113 | COL4A2  | GT | 111155230 |
| rs12873154 | COL4A1  | AG | 110920852 |
| rs12874003 | COL4A1  | AG | 110951315 |
| rs12874003 | COL4A2  | AG | 110951315 |
| rs12894295 | NID2    | AG | 52497718  |
| rs12904518 | LOXL1   | AC | 74247944  |
| rs12905452 | ACAN    | AC | 89371423  |
| rs12906911 | FBN1    | AC | 48828161  |
| rs12915677 | FBN1    | CT | 48864797  |
| rs12918370 | MMP2    | AG | 55424127  |
| rs12924764 | MMP2    | AG | 55498049  |
| rs12931375 | MMP2    | GT | 55467633  |
| rs12945599 | COL1A1  | CT | 48255183  |
| rs12969432 | EMILIN2 | AG | 2899428   |
| rs12992087 | COL6A3  | CT | 238324700 |
| rs13005714 | COL5A2  | CT | 189999011 |
| rs13006483 | ITGAV   | GT | 187522750 |
| rs13010821 | GPC1    | CT | 241416038 |
| rs13015794 | GPC1    | CT | 241369051 |
| rs13021572 | COL4A3  | AG | 228090768 |
| rs13024858 | COL5A2  | GT | 189981212 |
| rs13028299 | COL4A3  | AG | 228091661 |
| rs13028444 | COL3A1  | AC | 189876138 |
| rs13030208 | GPC1    | GT | 241368464 |
| rs13048083 | ADAMTS5 | CT | 28286853  |
| rs13050660 | COL6A2  | CT | 47546244  |
| rs13050770 | ITGB2   | CT | 46335401  |
| rs13058539 | FBLN1   | CT | 45962522  |
| rs13079599 | CCDC80  | AG | 112346521 |
| rs13082230 | ITGB5   | AG | 124478734 |

|            |         |    |           |
|------------|---------|----|-----------|
| rs13110600 | TLL1    | GT | 166810059 |
| rs13125117 | NPNT    | CT | 106909698 |
| rs13136952 | TLL1    | CT | 166833808 |
| rs13153507 | VCAN    | AC | 82845311  |
| rs13159176 | COL23A1 | CT | 177899270 |
| rs13164785 | VCAN    | GT | 82861400  |
| rs13178731 | COL23A1 | AG | 177811754 |
| rs13182062 | COL23A1 | CT | 177803040 |
| rs13187034 | COL23A1 | CT | 177979374 |
| rs13187323 | COL23A1 | CT | 177902122 |
| rs13199524 | TNXB    | CT | 32066765  |
| rs13201278 | COL12A1 | AG | 75915157  |
| rs13204236 | LAMA2   | AG | 129692686 |
| rs13216682 | LAMA2   | CT | 129394663 |
| rs13245672 | ADAM22  | AG | 87688046  |
| rs13257404 | COL14A1 | AG | 121125111 |
| rs13257482 | BMP1    | AG | 22059606  |
| rs13276675 | COL14A1 | CT | 121178772 |
| rs13288677 | COL5A1  | AG | 137581319 |
| rs13294483 | COL5A1  | AG | 137675994 |
| rs13297317 | COL5A1  | AG | 137701873 |
| rs13302368 | COL15A1 | AG | 101807566 |
| rs13306275 | COL3A1  | AG | 189855166 |
| rs13311608 | FKBP9   | AG | 32999601  |
| rs13353878 | ADAM19  | AG | 156960581 |
| rs13383261 | COL5A2  | CT | 189913748 |
| rs13392414 | COL4A3  | AG | 228060884 |
| rs13419630 | COL4A3  | AG | 228056218 |
| rs13422838 | ITGAV   | CT | 187502846 |
| rs13425379 | COL3A1  | AG | 189844599 |
| rs13429247 | PDIA6   | AG | 10960529  |
| rs13429913 | COL4A3  | CT | 228058913 |
| rs13431876 | COL6A3  | AG | 238316009 |
| rs13432972 | FN1     | AC | 216248460 |
| rs13433666 | FBLN1   | CT | 45902119  |
| rs13438950 | COL14A1 | CT | 121369401 |
| rs16833075 | NID1    | GT | 236157277 |
| rs16833089 | NID1    | CT | 236162449 |
| rs16835998 | ITGB5   | CT | 124500094 |
| rs16836078 | ITGB5   | CT | 124548599 |
| rs16836080 | ITGB5   | AG | 124548684 |
| rs16859850 | CCDC80  | GT | 112339845 |
| rs16859897 | CCDC80  | AG | 112362600 |
| rs16893529 | COL14A1 | AG | 121101436 |
| rs16893536 | COL14A1 | CT | 121103751 |
| rs16893621 | COL14A1 | AG | 121179736 |
| rs16893954 | COL14A1 | AG | 121371823 |
| rs16896468 | MATN2   | AG | 98974256  |

|            |           |     |           |
|------------|-----------|-----|-----------|
| rs16896493 | MATN2     | AGT | 98994920  |
| rs16896564 | MATN2     | CT  | 99032925  |
| rs16918081 | COL15A1   | CT  | 101697350 |
| rs16918099 | COL15A1   | AG  | 101715598 |
| rs16918124 | COL15A1   | CT  | 101761125 |
| rs16918167 | COL15A1   | GT  | 101815339 |
| rs16932062 | TNC       | CT  | 117776052 |
| rs16932078 | TNC       | CT  | 117796986 |
| rs16932160 | TNC       | AC  | 117829987 |
| rs16943929 | EMILIN2   | AG  | 2871811   |
| rs16943989 | EMILIN2   | AG  | 2892474   |
| rs16944003 | EMILIN2   | CT  | 2899324   |
| rs16955194 | MMP2      | AG  | 55505328  |
| rs16960886 | FBN1      | AG  | 48699486  |
| rs16961033 | FBN1      | AG  | 48795877  |
| rs16961065 | FBN1      | CT  | 48806539  |
| rs16961239 | FBN1      | AG  | 48906457  |
| rs16969364 | THBS1     | AG  | 39885470  |
| rs16975420 | COL4A1    | AC  | 110813991 |
| rs16975617 | COL4A1    | CT  | 110867408 |
| rs16994329 | FBLN1     | CT  | 45997852  |
| rs17012774 | SPARCL1   | CT  | 88443470  |
| rs17012782 | SPARCL1   | AG  | 88443685  |
| rs17018718 | LUM       | CT  | 91498199  |
| rs17018731 | LUM       | CT  | 91499367  |
| rs17036413 | NPNT      | CT  | 106894867 |
| rs17036476 | NPNT      | AG  | 106922246 |
| rs17038334 | FBLN2     | AG  | 13647142  |
| rs17047075 | TLL1      | AC  | 166839266 |
| rs17047205 | TLL1      | AG  | 166953579 |
| rs17047207 | TLL1      | AG  | 166956652 |
| rs17047228 | TLL1      | CT  | 166997752 |
| rs17047248 | TLL1      | AG  | 167011894 |
| rs17054657 | ADAM19    | CT  | 156927875 |
| rs17054692 | ADAM19    | AG  | 156962401 |
| rs17057149 | LAMA2     | CT  | 129644548 |
| rs17057158 | LAMA2     | CT  | 129670548 |
| rs17073563 | LAMA4     | CT  | 112527772 |
| rs17081208 | COL23A1   | AG  | 177849300 |
| rs17081220 | COL23A1   | CT  | 177852582 |
| rs17090997 | SERPINA12 | AG  | 94986912  |
| rs17094919 | SERPINA12 | CT  | 94984522  |
| rs17111762 | TLL2      | CT  | 98141748  |
| rs17111841 | TLL2      | AG  | 98179762  |
| rs17122926 | MMP14     | GT  | 23299915  |
| rs17122962 | MMP14     | AG  | 23302565  |
| rs17124884 | NID2      | AG  | 52482698  |
| rs17124893 | NID2      | AG  | 52485197  |

|            |         |    |           |
|------------|---------|----|-----------|
| rs17124972 | NID2    | AG | 52521893  |
| rs17125001 | NID2    | CT | 52541199  |
| rs17127492 | COL11A1 | AG | 103576364 |
| rs17127649 | FBLN5   | CT | 92339519  |
| rs17131536 | TGFBR3  | CT | 92181478  |
| rs17131552 | TGFBR3  | AG | 92224815  |
| rs17131553 | TGFBR3  | AG | 92226887  |
| rs17134462 | PPIA    | AG | 44845032  |
| rs17145990 | ELN     | CT | 73438515  |
| rs17150369 | ADAM22  | CT | 87839690  |
| rs17154105 | ADAM12  | AC | 127733872 |
| rs17154306 | ADAM12  | AG | 127829304 |
| rs17154587 | ADAM12  | CT | 127946649 |
| rs17154643 | ADAM12  | AG | 127964859 |
| rs17154787 | ADAM12  | AG | 128083065 |
| rs17155554 | ADAM12  | AC | 127936662 |
| rs17178474 | FBLN2   | CT | 13584980  |
| rs17201864 | ACAN    | CT | 89420974  |
| rs17205951 | VCAN    | GT | 82848324  |
| rs17232065 | MMP2    | CT | 55425383  |
| rs17237080 | COL14A1 | CT | 121295744 |
| rs17241017 | MMP2    | AG | 55485757  |
| rs17252755 | ADAM22  | CT | 87573612  |
| rs17282085 | ITGB5   | AG | 124521263 |
| rs17292943 | COL3A1  | AG | 189847300 |
| rs17293152 | MMP10   | AG | 102633134 |
| rs17293642 | MMP1    | CT | 102654928 |
| rs17293642 | MMP10   | CT | 102654928 |
| rs17296289 | ITGB1   | AG | 33260699  |
| rs17299191 | MMP2    | CT | 55472083  |
| rs17300655 | MMP2    | AC | 55491049  |
| rs17301608 | MMP2    | CT | 55518610  |
| rs17319250 | PLOD3   | CT | 100861213 |
| rs17342005 | ADAM22  | CT | 87800082  |
| rs17352842 | FBN1    | CT | 48694211  |
| rs17357592 | COL6A2  | CT | 47542779  |
| rs17358566 | COL3A1  | CT | 189837995 |
| rs17359286 | MMP10   | GT | 102643718 |
| rs17364665 | FBN1    | AC | 48884829  |
| rs17365477 | PDIA6   | CT | 10970124  |
| rs17367956 | COL4A3  | AG | 228064828 |
| rs17388474 | TLL2    | AG | 98129058  |
| rs17455729 | PDIA6   | AG | 10928250  |
| rs17463112 | SPON1   | CT | 14001955  |
| rs17505781 | TLL1    | CT | 166967504 |
| rs17513917 | TGFBR3  | CT | 92205197  |
| rs17516906 | FN1     | AG | 216279273 |
| rs17517598 | COL4A1  | GT | 110825264 |

|            |           |    |           |
|------------|-----------|----|-----------|
| rs17517971 | COL4A1    | AG | 110828119 |
| rs17556665 | SPON1     | GT | 14098482  |
| rs17564689 | FBLN1     | AG | 46006110  |
| rs17571088 | TGFBR3    | AG | 92146890  |
| rs17574203 | TGFBR3    | AC | 92265144  |
| rs17576372 | TGFBR3    | CT | 92366174  |
| rs17588591 | COL4A1    | GT | 110808738 |
| rs17589948 | COL23A1   | AG | 177904577 |
| rs17590344 | TLL1      | AG | 166960363 |
| rs17590882 | ADAM17    | AG | 9661775   |
| rs17599222 | ADAM19    | GT | 156817266 |
| rs17633210 | THBS1     | AC | 39900566  |
| rs17641413 | COL23A1   | CT | 177773700 |
| rs17648414 | COL23A1   | CT | 177851690 |
| rs17659250 | ADAM19    | CT | 156940873 |
| rs17684676 | ADAM12    | AG | 127951798 |
| rs17684713 | ADAM12    | AC | 127952874 |
| rs17689892 | TLL1      | AC | 166927050 |
| rs17689964 | TLL1      | AG | 166946775 |
| rs17711860 | COL15A1   | AG | 101800106 |
| rs17718324 | SPARC     | AG | 151058179 |
| rs17742838 | LAMA2     | CT | 129681346 |
| rs17752721 | LAMA2     | CT | 129820505 |
| rs17752900 | SERPINA12 | CT | 94983794  |
| rs17752932 | SERPINA12 | AG | 94986871  |
| rs17753252 | LAMA2     | AG | 129841984 |
| rs17759651 | ADAM12    | CT | 128066982 |
| rs17783485 | LAMA2     | AG | 129427787 |
| rs17783615 | COL12A1   | CT | 75878185  |
| rs17799083 | LAMA2     | AC | 129673136 |
| rs17802266 | SPON2     | AC | 1158991   |
| rs17805293 | FBLN5     | CT | 92369592  |
| rs17805775 | CILP      | CT | 65505038  |
| rs17819305 | TNC       | CT | 117816230 |
| rs17825644 | SERPINA12 | CT | 94944112  |
| rs17829645 | MATN2     | CT | 98954739  |
| rs17833457 | COL14A1   | GT | 121276075 |
| rs35013643 | ITGB2     | AG | 46320283  |
